# Supplementary material for: Transcriptome profile of the early stages of breast cancer tumoral spheroids
Source: PubMed Central journal article supplement (PMC4810430; doi:10.1038/srep23373), 2016-03-29

## **Transcriptome profile of the early stages of breast cancer tumoral spheroids**

Rosario Pacheco-Marín <sup>a,c</sup>, Jorge Melendez-Zajgla <sup>b</sup>, Gonzalo Castillo-Rojas <sup>c</sup>, Edna Mandujano-Tinoco <sup>b</sup>, Alfredo Garcia-Venzor <sup>b</sup>, Salvador Uribe-Carvajal <sup>d</sup>, Alfredo Cabrera-Orefice <sup>d</sup>, Carolina Gonzalez-Torres <sup>b</sup>, Javier Gaytan-Cervantes <sup>b</sup>, Irma B Mitre-Aguilar <sup>f</sup> and Vilma Maldonado<sup>a\*</sup>.

<sup>a</sup> Epigenetics and <sup>b</sup> Functional Genomics laboratories, National Institute of Genomic Medicine. Periférico Sur No.4809, Col Arenal Tepepan, Delegación Tlalpan, México, D.F., C.P 14610

<sup>c</sup> Microbial Molecular Immunology Program, Department of Microbiology and Parasitology. Faculty of Medicine, National Autonomous University of Mexico (UNAM), University City Avenue 3000 C.P. 04510, Coyoacan, Mexico City.

<sup>d</sup> Department of Molecular Genetics, Institute of Cellular Physiology (UNAM), University City Avenue 3000 C.P. 04510, Coyoacan, Mexico City.

<sup>e</sup> Posgraduate Program in Biological Sciences, Faculty of Medicine (UNAM), University City Avenue 3000 C.P. 04510, Coyoacan, Mexico City.

<sup>f</sup> Unit of Biochemistry, National Institute of Medical Sciences and Nutrition Salvador Zubirán (INCMNSZ), Av. Vasco de Quiroga N° 15, Colonia Belisario Domínguez Sección XVI, Delegación Tlalpan. CP.14080, México D. F., México

\* Correspondence to [vilmaml@gmail.com](mailto:vilmaml@gmail.com)

**Supplementary Table S1.** Primers of lncRNAs, mRNAs and endogenous control (TBP)

| GEN                                     | Sequence forward               | Sequence reverse             |
|-----------------------------------------|--------------------------------|------------------------------|
| lnc-CAMK1G-1:2                          | 5'-CTCCCTGCTTCGGGTCAGA-3'      | 5'-GCCCCATAAAAGGCTGTTCTC-3'  |
| lnc-PPP2R4-4:1                          | 5'-CCCTGCACGTGGATATTAGAGTTT-3' | 5'-GGGACCTTGACCTACAAAATC-3'  |
| lnc-AGBL1-4:1                           | 5'-AATGGCAACCATCAAATCAAGA-3'   | 5'-GCAAAGCATCACAATTCATGGA-3' |
| lnc-KIAA1755-5:3                        | 5'-TCTCGAAATCTGCAGACATCTTG-3'  | 5'-GTGAGAGTGGAGCCGACCAT-3'   |
| lnc-IGSF5-1:1                           | 5'-GGGCCACAACCTCAACCCATA-3'    | 5'-GCTGGTCGTTGCTCAAGAAAC-3'  |
| lnc-MLN-1:2                             | 5'-TTCAGGCCCCGAGTTTCTC-3'      | 5'-GGGCAAGGGCAGAGTAGGA-3'    |
| lnc-CPEB4-6:1                           | 5'-ACCTCTCCTGCGTTTGATCTG-3'    | 5'-GGCCGTGGGCAAGTACTT-3'     |
| lnc-MYC-2:24, 2:5, 2:8 and 2:9 isoforms | 5'-CTTCCAGTGGATTCCTTGC-3'      | 5'-TTTCTCCCAGACACGGATTC-3'   |
| lnc-GAPDH-2:1                           | 5'-GGCTGTTGTGATTCAGTTGG-3'     | 5'-ATCGCCACCAAGATTACAG-3'    |
| lnc-HIST1H2AG-2:1                       | 5'-ATGGTTTGCAGAGGCTCAAG-3'     | 5'-TGGGTGACAGGTTTGATGTC-3'   |
| lnc-ANKRD30A-4:1                        | 5'-TGCTGCAGGCAATTATGC-3'       | 5'-GCTTTTTCCAAAGGGGTTG-3'    |
| MYC                                     | 5'-GTTTGCCATTACCGTTTCTC-3'     | 5'-TGCAGAAGGTCCGAAGAAAG-3'   |
| GAPDH                                   | 5'-CAATGACCCCTTCATTGACC-3'     | 5'-ATGACAAGCTTCCCGTTCTC-3'   |
| HIST1H2AG                               | 5'-TGCCCAAAAAGACTGAGAGC-3'     | 5'-AAAGAGCCGTTGGTTTGGAC-3'   |
| ANKRD30A                                | 5'-AACACGGCTCTCCATTATGC-3'     | 5'-TAGCCTTGTTGTGCACTTCG-3'   |
| COX8A                                   | 5'-TCCCCTGGATCATGTCATTC-3'     | 5'-CACCATGGAGACATCAAGAGG-3'  |
| NDUFA1                                  | 5'-CGTGTGCTTGTTGATTCCAG-3'     | 5'-TGCGCCTATCTTTCCATC-3'     |
| TP53                                    | 5'-GTCTTTGAACCCTTGCTTGC-3'     | 5'-CCACAACAAAACACCAGTGC-3'   |
| ITGB6                                   | 5'-CGACTGTGACTGTGGTGAAT-3'     | 5'-CTTTGGTTCAGAAATGCAAG-3'   |
| TBP                                     | 5'-CCACAGCTCTTCCACTCACA -3'    | 5'-CTCATGATTACCGCAGCAAA -3'  |

**Supplementary Table S2.** Cell index between monolayers and spheroids disaggregated, as well as MDA-MB- 231 monolayer cells (Positive control)

| Culture condition              | Time         |         |              |         |
|--------------------------------|--------------|---------|--------------|---------|
|                                | 24h          |         | 30h          |         |
|                                | Cell index   | p-value | Cell index   | p-value |
| Monolayer                      | 0.02 ± 0.01  | <0.0001 | 0.02 ± 0.01  | <0.0001 |
| Spheroids disaggregated 6 days | 0.26 ± 0.11  |         | 0.42 ± 0.04  |         |
| MDA-MB-231                     | 1.684 ± 0.11 |         | 1.797 ± 0.07 |         |

**Supplementary Table S3.** Genes mRNAs top up/down related to breast cancer and metastasis

| <b>GEN</b>      | <b>Name</b>                                                                 | <b>References</b> |
|-----------------|-----------------------------------------------------------------------------|-------------------|
| <b>CLDN4*</b>   | Claudin 4                                                                   | 1-4               |
| <b>FST*</b>     | Follistatin                                                                 | 5-8               |
| <b>MIF*</b>     | Macrophage migration inhibitory factor<br>(glycosylation-inhibiting factor) | 9,10              |
| <b>NPY1R*</b>   | Neuropeptide Y receptor Y1                                                  | 11                |
| <b>PGR*</b>     | Progesterone receptor                                                       | 12                |
| <b>PMP22*</b>   | Peripheral myelin protein 22                                                | 13-15             |
| <b>S100A9*</b>  | S100 calcium binding protein A9                                             | 16                |
| <b>TFF1*</b>    | Trefoil factor 1                                                            | 17                |
| <b>RERG*</b>    | RAS-like, estrogen-regulated, growth<br>inhibitor                           | 18                |
| <b>COL12A1*</b> | <u>Collagen, type XII, alpha 1</u>                                          | 19                |
| <b>COL4A5*</b>  | <u>Collagen, type IV, alpha 5</u>                                           | 20,21             |
| <b>S100A6</b>   | S100 calcium binding protein A6                                             | 22                |
| <b>RPS12</b>    | Ribosomal protein S12                                                       | 23,24             |
| <b>NAALADL2</b> | <u>N-acetylated alpha-linked acidic<br/>dipeptidase-like 2</u>              | 25                |
| <b>IFIT2</b>    | Interferon-induced protein with<br>tetratricopeptide repeats 2              | 26,27             |
| <b>ATP5E</b>    | ATP synthase, H <sup>+</sup> transporting,<br>mitochondrial F1 complex      | 28                |
| <b>ANKRD1</b>   | <u>Ankyrin repeat domain 1 (cardiac muscle)</u>                             | 29                |
| <b>RPS21</b>    | Ribosomal Protein S21                                                       | 30                |
| <b>POF1B</b>    | <u>Premature ovarian failure, 1B</u>                                        | 31                |
| <b>RPL36AL</b>  | <u>Ribosomal protein L36a-like</u>                                          | 32                |

\* Related genes in breast cancer metastasis and down-regulated are in bold letters. *See references on next page*

## Reference

- 1 Jiwa, L. S. *et al.* Upregulation of Claudin-4, CAIX and GLUT-1 in distant breast cancer metastases. *BMC Cancer* **14**, 864 (2014).
- 2 Abd-Elazeem, M. A. & Abd-Elazeem, M. A. Claudin 4 expression in triple-negative breast cancer: correlation with androgen receptors and Ki-67 expression. *Ann Diagn Pathol* **19**, 37-42 (2015).
- 3 Lanigan, F. *et al.* Increased claudin-4 expression is associated with poor prognosis and high tumour grade in breast cancer. *Int J Cancer* **124**, 2088-2097 (2009).
- 4 Blanchard, A. A. *et al.* Differential expression of claudin 1, 3, and 4 during normal mammary gland development in the mouse. *DNA Cell Biol* **25**, 79-86 (2006).
- 5 Mock, K. *et al.* The EMT-activator ZEB1 induces bone metastasis associated genes including BMP-inhibitors. *Oncotarget* **6**, 14399-14412 (2015).
- 6 Ohta, N. *et al.* Human umbilical cord matrix mesenchymal stem cells suppress the growth of breast cancer by expression of tumor suppressor genes. *PLoS One* **10**, e0123756 (2015).
- 7 Sengupta, D. *et al.* ERbeta signalling through FST and BCAS2 inhibits cellular proliferation in breast cancer cells. *Br J Cancer* **110**, 2144-2158 (2014).
- 8 Karagiannis, G. S., Berk, A., Dimitromanolakis, A. & Diamandis, E. P. Enrichment map profiling of the cancer invasion front suggests regulation of colorectal cancer progression by the bone morphogenetic protein antagonist, gremlin-1. *Mol Oncol* **7**, 826-839 (2013).
- 9 Verjans, E. *et al.* Dual role of macrophage migration inhibitory factor (MIF) in human breast cancer. *BMC Cancer* **9**, 230 (2009).
- 10 Zhang, M., Yan, L. & Kim, J. A. Modulating mammary tumor growth, metastasis and immunosuppression by siRNA-induced MIF reduction in tumor microenvironment. *Cancer Gene Ther* **22**, 463-474 (2015).
- 11 Liu, L. *et al.* NPY1R is a novel peripheral blood marker predictive of metastasis and prognosis in breast cancer patients. *Oncol Lett* **9**, 891-896 (2015).
- 12 Aurilio, G. *et al.* A meta-analysis of oestrogen receptor, progesterone receptor and human epidermal growth factor receptor 2 discordance between primary breast cancer and metastases. *Eur J Cancer* **50**, 277-289 (2014).
- 13 Mimori, K. *et al.* Identification of molecular markers for metastasis-related genes in primary breast cancer cells. *Clin Exp Metastasis* **22**, 59-67 (2005).
- 14 Winslow, S., Leandersson, K. & Larsson, C. Regulation of PMP22 mRNA by G3BP1 affects cell proliferation in breast cancer cells. *Mol Cancer* **12**, 156 (2013).
- 15 Tong, D. *et al.* Gene expression of PMP22 is an independent prognostic factor for disease-free and overall survival in breast cancer patients. *BMC Cancer* **10**, 682 (2010).
- 16 Gumireddy, K. *et al.* ID1 promotes breast cancer metastasis by S100A9 regulation. *Mol Cancer Res* **12**, 1334-1343 (2014).
- 17 Wang, H. *et al.* Gene expression markers in circulating tumor cells may predict bone metastasis and response to hormonal treatment in breast cancer. *Mol Clin Oncol* **1**, 1031-1038 (2013).

- 18 Habashy, H. O. *et al.* RERG (Ras-like, oestrogen-regulated, growth-inhibitor) expression in breast cancer: a marker of ER-positive luminal-like subtype. *Breast Cancer Res Treat* **128**, 315-326 (2011).
- 19 Dalgin, G. S. *et al.* Portraits of breast cancer progression. *BMC Bioinformatics* **8**, 291 (2007).
- 20 Nakano, S. *et al.* Differential tissular expression and localization of type IV collagen alpha1(IV), alpha2(IV), alpha5(IV), and alpha6(IV) chains and their mRNA in normal breast and in benign and malignant breast tumors. *Lab Invest* **79**, 281-292 (1999).
- 21 Wong, N. A., Wingate, J. & Colling, R. A study of alpha5 chain of collagen IV, caldesmon, placental alkaline phosphatase and smoothelin as immunohistochemical markers of gastrointestinal smooth muscle neoplasms. *J Clin Pathol* **67**, 105-111 (2014).
- 22 McKiernan, E., McDermott, E. W., Evoy, D., Crown, J. & Duffy, M. J. The role of S100 genes in breast cancer progression. *Tumour Biol* **32**, 441-450 (2011).
- 23 Deng, S. S. *et al.* Comparative proteome analysis of breast cancer and adjacent normal breast tissues in human. *Genomics Proteomics Bioinformatics* **4**, 165-172 (2006).
- 24 Chen, D. *et al.* RPS12-specific shRNA inhibits the proliferation, migration of BGC823 gastric cancer cells with S100A4 as a downstream effector. *Int J Oncol* **42**, 1763-1769 (2013).
- 25 Whitaker, H. C. *et al.* N-acetyl-L-aspartyl-L-glutamate peptidase-like 2 is overexpressed in cancer and promotes a pro-migratory and pro-metastatic phenotype. *Oncogene* **33**, 5274-5287 (2014).
- 26 Motaghed, M., Al-Hassan, F. M. & Hamid, S. S. Thymoquinone regulates gene expression levels in the estrogen metabolic and interferon pathways in MCF7 breast cancer cells. *Int J Mol Med* **33**, 8-16 (2014).
- 27 Reich, N. C. A death-promoting role for ISG54/IFIT2. *J Interferon Cytokine Res* **33**, 199-205 (2013).
- 28 Huber-Keener, K. J. *et al.* Differential gene expression in tamoxifen-resistant breast cancer cells revealed by a new analytical model of RNA-Seq data. *PLoS One* **7**, e41333 (2012).
- 29 Scurr, L. L. *et al.* Ankyrin repeat domain 1, ANKRD1, a novel determinant of cisplatin sensitivity expressed in ovarian cancer. *Clin Cancer Res* **14**, 6924-6932 (2008).
- 30 Dago, D. N. *et al.* Estrogen receptor beta impacts hormone-induced alternative mRNA splicing in breast cancer cells. *BMC Genomics* **16**, 367 (2015).
- 31 Figueiredo, N. B. *et al.* Estrogen-responsive genes overlap with triiodothyronine-responsive genes in a breast carcinoma cell line. *ScientificWorldJournal* **2014**, 969404 (2014).
- 32 Saletta, F., Suryo Rahmanto, Y., Noulsri, E. & Richardson, D. R. Iron chelator-mediated alterations in gene expression: identification of novel iron-regulated molecules that are molecular targets of hypoxia-inducible factor-1 alpha and p53. *Mol Pharmacol* **77**, 443-458 (2010).
- 33 Zhang, X. *et al.* A pituitary-derived MEG3 isoform functions as a growth suppressor in tumor cells. *J Clin Endocrinol Metab* **88**, 5119-5126, (2003).

**Supplementary Table S4.** Genes up and down regulated of top five canonical pathways (IPA)

| <b>Pathways</b>                 | <b>Up-regulated</b>                                                                                                                                                                                                                      | <b>Down-regulated</b>                           | <b>Total</b> |
|---------------------------------|------------------------------------------------------------------------------------------------------------------------------------------------------------------------------------------------------------------------------------------|-------------------------------------------------|--------------|
| 1.EIF2 signaling                | <b>AKT1, PPP1CA, EIF</b> (1/2AK1/2B2/2B5/3B/3C/3D/3G/3I/3K/3L/4A1-4A3/4G1) <b>RPL</b> (3-8/11-14/17-19/22-24/ 26-27/29-32/34-39/41/10A/13A/18A/23A/26L1/35A/36AL/ 37A/7A/P0-P2) <b>RPS</b> (2/3/5-9/11-16/18-21/23/25/27-30/15A/3A/4X/A) | <b>PIK3CA</b> and <b>RRAS2</b>                  | 87           |
| 2.Mitochondrial dysfunction     | <i>Include all genes the oxidative phosphorylation more:</i><br><b>AIFM1, APH1A, FIS1, GPX4, HSD17B10, PARK7, PRDX</b> (3 and 5) and <b>TXN2</b>                                                                                         | <b>BACE2, BCL2, NDUFAF2</b> and <b>MAP2K4</b>   | 55           |
| 3.mTOR signaling                | <b>AKT1, DDIT4, RND3, EIF</b> (3B/3C/3D/3G/3I/3K/3L/4A1-4A3/4EBP1/4G1)<br><br><b>PPP2</b> (R4 and R1A), <b>RAC1, RHO</b> (A and C), <b>VEGFA</b> and <i>include all the genes RPS of pathway EIF2 signaling</i>                          | <b>PIK3CA, RICTOR, RPS6KA3</b> and <b>RRAS2</b> | 52           |
| 4.Regulation of EIF4 and p70S6K | <b>AKT1, PPP2</b> (R4 and R1A), <b>EIF4EBP1</b><br><i>more include all the genes EIF (except EIF2AK1) and RPS of pathway EIF2 signaling</i>                                                                                              | <b>ITGA2, PIK3CA</b> and <b>RRAS2</b>           | 48           |
| 5.Oxidative phosphorylation     | <b>ATP</b> (5B/5C1/5E/5G1/5H/5I/ 5J2/5L/5O)<br><b>NDUF</b> (A1/A2/A6/A9/A13/B1-B3/B7-B11/S2-S3/S5/S8/V1)<br><b>COX</b> (4I1/5A/5B/6A1/6B1/7A2/ 7B/7C/8A),<br><b>CYB5A, CYC1, SDHB</b> and <b>UQCR</b> (C1 and H)                         | <b>NDUFS4</b>                                   | 42           |

**Supplementary Table S5.** Canonical pathways related to cellular cycle (IPA)

| <b>Pathways</b>                             | <b>Up-regulated</b>                                                                | <b>Down-regulated</b>                     | <b>Total</b> |
|---------------------------------------------|------------------------------------------------------------------------------------|-------------------------------------------|--------------|
| PI3K/AKT signaling                          | AKT1, CDC37, CDKN1B, EIF4EBP1, HSP90AB1, HSP90B1, INPPL1, PPP2R4, PPP2R1A and TP53 | BCL2, ITGA2, PIK3CA and RRAS2             | 14           |
| PTEN signaling                              | AKT1, CDKN1B, INPPL1, MCRC1 and PIK3CA                                             | BCL2, BMPR2, ITGA2, MAGI3, RAC1 and RRAS2 | 11           |
| Cell cycle: G1/S Checkpoint regulation      | CDK4, CDKN1B, E2F4, MAX, MYC, PA2G4, TP53, RPL5 and RPL11                          |                                           | 9            |
| HER-2 signaling in breast Cancer            | AKT1, CDKN1B, ITGB5 and TP53                                                       | AREG, ITGB6, PARD3, PIK3CA and RRAS2      | 9            |
| Cell cycle regulation by BTG family protein | CDK4, E2F4, PPP2R4, PPP2R1A and PRMT1                                              |                                           | 5            |
| Estrogen-mediated S-phase entry             | CDK4, CDKN1B, E2F4 and MYC                                                         |                                           | 4            |



**Supplementary Table S6.** Relations between lncRNA and the a adjacent mRNA protein-coding gene differentially expressed.

| Symbol mRNA         | Gene name                                                       | Fold change | Symbol lncRNA | Fold change | Location lncRNA     | Location mRNA       | Chr |
|---------------------|-----------------------------------------------------------------|-------------|---------------|-------------|---------------------|---------------------|-----|
| ABHD2               | Abhydrolase domain containing 2                                 | 2.5         | ABHD2-1:5     | **          | 89584454-89626050   | 89631381-89745591   | 15  |
| AD11                | Acireductone dioxygenase 1                                      | 3.0         | AD11-2:1      | **          | 3302112-3305236     | 3501690-3523350     | 2   |
| ANKRD30A            | Ankyrin repeat domain 30A                                       | *           | ANKRD30A-4:1  | *           | 37229037-37232860   | 37414785-37521495   | 10  |
| ANKRD40             | Ankyrin repeat domain 40                                        | 2.2         | ANKRD40-1:1   | *           | 48840212-48844918   | 48770551-48785270   | 17  |
|                     |                                                                 |             | ANKRD40-1:5   | *           | 48838535-48844877   |                     | 17  |
| ARL15               | ADP-ribosylation factor-like 15                                 | -4.6        | ARL15-1:1     | *           | 53072474-53115516   | 53180614-53606403   | 5   |
| ARL4A               | ADP-ribosylation factor-like 4A                                 | -2.0        | ARL4A-1:1     | *           | 13141016-13142014   | 12726452-12730559   | 7   |
| ARMCX3              | Armadillo repeat containing, X-linked 3                         | 2.1         | ARMCX3-1:1    | 2.7         | 100882858-100883508 | 100878120-100882831 | X   |
| ATF7IP              | Activating transcription factor 7 interacting protein           | -3.2        | ATF7IP-3:1    | **          | 14369524-14374231   | 14518611-14651697   | 12  |
| BOD1                | Biorientation of chromosomes in cell division 1                 | 2.7         | BOD1-2:1      | *           | 173217812-173236042 | 173034148-173043666 | 5   |
| CCT5                | Chaperonin containing TCP1, subunit 5 (epsilon)                 | 2.2         | CCT5-2:1      | -2.5        | 10137250-10138477   | 10250282-10266501   | 5   |
| CD63                | CD63 molecule                                                   | 2.1         | CD63-1:1      | 6.0         | 56155334-56156412   | 56119230-56122910   | 12  |
| CHD2                | Chromodomain helicase DNA binding protein 2                     | -2.4        | CHD2-4:2      | -2.5        | 93855786-94098099   | 93443551-93571237   | 15  |
| CHMP1A              | Chromatin modifying protein 1A                                  | 2.6         | CHMP1A-2:1    | *           | 89458783-89478972   | 89710843-89724129   | 16  |
| COMMD10             | COMM domain containing 10                                       | -2.4        | COMMD10-3:1   | **          | 115910178-115927094 | 115420727-115628978 | 5   |
| COMMD3              | COMM domain containing 3                                        | 2.1         | COMMD3-1:1    | *           | 22546715-22547477   | 22605312-22609246   | 10  |
| CYB5A <sup>4</sup>  | Cytochrome b5 type A (microsomal)                               | 2.6         | CYB5A-1:2     | *           | 71878626-71879804   | 71920527-71959251   | 18  |
| DAD1                | Defender against cell death 1                                   | 2.4         | DAD1-2:1      | **          | 22849083-22951948   | 23033807-23058143   | 14  |
|                     |                                                                 |             | DAD1-2:6      | **          | 22850773-22901719   |                     |     |
| EEF1B2              | Eukaryotic translation elongation factor 1 beta 2               | 5.4         | EEF1B2-2:2    | **          | 206950246-206950880 | 207024318-207027653 | 2   |
| EIF3B <sup>1</sup>  | Eukaryotic translation initiation factor 3, subunit B           | 3.1         | EIF3B-1:1     | **          | 2423756-2428232     | 2394474-2420380     | 7   |
| EIF4A3 <sup>1</sup> | Eukaryotic translation initiation factor 4A, isoform 3          | 2.3         | EIF4A3-1:1    | 4.0         | 77965743-77966640   | 78109013-78120982   | 17  |
| FAM83B              | Family with sequence similarity 83, member B                    | -2.4        | FAM83B-1:1    | 2.3         | 54807965-54809897   | 54711569-54806820   | 6   |
| GAPDH               | Glyceraldehyde-3-phosphate dehydrogenase-like 6                 | 2.7         | GAPDH-2:1     | **          | 6619441-6619688     | 6643657-6647536     | 12  |
| GGCT                | Gamma-glutamyl cyclotransferase                                 | 3.2         | GGCT-1:21     | -7.0        | 30555925-30602441   | 30536237-30544457   | 7   |
| GLCE                | Glucuronic acid epimerase                                       | -2.0        | GLCE-1:1      | **          | 69571014-69580903   | 69452973-69564544   | 15  |
| H3F3A               | H3 histone family 3A                                            | -2.9        | H3F3A-1:1     | *           | 226274582-226277993 | 226250408-226259703 | 1   |
| HIATL1              | Hippocampus abundant transcript-like 1                          | -2.5        | HIATL1-4:1    | 3.9         | 97320996-97330312   | 97136833-97223202   | 9   |
| HIST1H2AG           | Histone cluster 1, H2AG                                         | 4.5         | HIST1H2AG-2:1 | 8.0         | 26988232-26991703   | 27100817-27101314   | 6   |
| ITGA2 <sup>7</sup>  | Integrin, alpha 2 (CD49B, alpha 2 subunit of VLA-2 receptor)    | -2.3        | ITGA2-1:3     | *           | 52405707-52410027   | 52285156-52390609   | 5   |
| LEMD3               | LEM domain containing 3                                         | -2.2        | LEMD3-1:1     | **          | 65675437-65680508   | 65563351-65642141   | 12  |
| LRBA                | LPS-responsive vesicle trafficking, beach and anchor containing | -2.3        | LRBA-2:1      | -3.5        | 150509142-150817385 | 151185594-151936649 | 4   |
| MYC <sup>3</sup>    | v-myc myelocytomatosis viral oncogene homolog (avian)           | 4.4         | MYC-2:24      | *           | 129001463-129108824 | 128748315-128753680 | 8   |
|                     |                                                                 |             | MYC-2:5       | **          | 128806806-128951855 |                     |     |
|                     |                                                                 |             | MYC-2:8       | 4.5         | 128808059-128903041 |                     |     |
|                     |                                                                 |             | MYC-2:9       | 2.2         | 128808066-128903206 |                     |     |
| NRIP1               | Nuclear receptor interacting protein 1                          | -2.8        | NRIP1-2:1     | 2.7         | 16742841-16774624   | 16333556-16437126   | 21  |
| NT5DC1              | 5'-nucleotidase domain containing 1                             | -2.7        | NT5DC1-1:1    | 4.0         | 116575370-116577906 | 116421999-116566853 | 6   |
| PARK7 <sup>6</sup>  | Parkinson disease (autosomal recessive, early onset) 7          | 2.8         | PARK7-1:1     | *           | 8086798-8182762     | 8021714-8045342     | 1   |
| PCBP1               | Poly(rC) binding protein 1                                      | 3.0         | PCBP1-1:1     | **          | 70316853-70323232   | 70314585-70316335   | 2   |
| PGR                 | Progesterone receptor                                           | -14.0       | PGR-1:1       | **          | 100554893-100558686 | 100900355-101000544 | 11  |
| PGRMC1              | Progesterone receptor membrane component 1                      | 2.6         | PGRMC1-1:1    | 2.1         | 118425492-118469573 | 118370211-118378429 | X   |
| PLCB1               | Phospholipase C, beta 1 (phosphoinositide-specific)             | -4.6        | PLCB1-1:1     | **          | 8000549-8008603     | 8113296-8865547     | 20  |
| PMP22               | Peripheral myelin protein 22                                    | 18.4        | PMP22-1:1     | **          | 15170778-15175607   | 15133096-15168644   | 17  |

|                     |                                                                                             |      |                                                                                |                                          |                                                                                                                            |                     |    |
|---------------------|---------------------------------------------------------------------------------------------|------|--------------------------------------------------------------------------------|------------------------------------------|----------------------------------------------------------------------------------------------------------------------------|---------------------|----|
| PPP2R4 <sup>5</sup> | Protein phosphatase 2A activator, regulatory subunit 4                                      | 3.7  | PPP2R4-4:1<br>PPP2R4-5:1<br>PPP2R4-5:3<br>PPP2R4-5:4                           | -3.1<br>*<br>-5.4<br>-3.0                | 132083295-132087184<br>132094579-132101180<br>132099158-132109743<br>132104122-132121817                                   | 131873228-131911225 | 9  |
| PSME1               | Proteasome (prosome, macropain) activator subunit 1 (PA28 alpha)                            | 3.0  | PSME1-1:2                                                                      | 3.1                                      | 24608654-24609653                                                                                                          | 24605378-24608176   | 14 |
| RASA1               | RAS p21 protein activator (GTPase activating protein) 1                                     | -3.0 | RASA1-3:4<br>RASA1-3:9                                                         | 4.0<br>3.8                               | 87564841-87581884<br>87564864-87583473                                                                                     | 86564151-86687733   | 5  |
| RPL24 <sup>2</sup>  | Ribosomal protein L24                                                                       | 4.0  | RPL24-2:3                                                                      | **                                       | 102382007-102392757                                                                                                        | 101399934-101405563 | 3  |
| RPLP1 <sup>2</sup>  | Ribosomal protein, large, P1                                                                | 4.4  | RPLP1-1:1<br>RPLP1-1:11<br>RPLP1-1:18<br>RPLP1-1:9                             | **<br>**<br>10.0<br>**                   | 69755365-69857576<br>69854062-69863422<br>69857531-69863775<br>69850531-69863422                                           | 69745159-69747884   | 15 |
| RPS14 <sup>1</sup>  | Ribosomal protein S14                                                                       | 4.5  | RPS14-1:2                                                                      | **                                       | 149855094-149865531                                                                                                        | 149823792-149829319 | 5  |
| RPS7 <sup>1</sup>   | Ribosomal protein S7                                                                        | 2.3  | RPS7-1:10                                                                      | 2.3                                      | 3606168-3609321                                                                                                            | 3622853-3628509     | 2  |
| SBDS                | Shwachman-Bodian-Diamond syndrome pseudogene                                                | 2.5  | SBDS-5:1<br>SBDS-5:2                                                           | -4.0<br>-2.9                             | 65956996-65958553<br>65956083-65958525                                                                                     | 66452690-66460588   | 7  |
| SCD                 | Stearyl-CoA desaturase (delta-9-desaturase)                                                 | 7.0  | SCD-1:10                                                                       | 2.0                                      | 102133372-102143125                                                                                                        | 102106772-102124588 | 10 |
| SLC12A2             | Solute carrier family 12 (sodium/potassium/chloride transporters), member 2                 | 3.3  | SLC12A2-1:2                                                                    | **                                       | 127270935-127277199                                                                                                        | 127419483-127525380 | 5  |
| SLC16A4             | Solute carrier family 16, member 4 (monocarboxylic acid transporter 5)                      | -2.5 | SLC16A4-1:1                                                                    | 6.0                                      | 110828997-110881793                                                                                                        | 110905473-110933704 | 1  |
| SLC25A5             | Solute carrier family 25 (mitochondrial carrier; adenine nucleotide translocator), member 5 | 3.2  | SLC25A5-1:1                                                                    | **                                       | 118556880-118557510                                                                                                        | 118602363-118605359 | X  |
| SLITRK6             | SLIT and NTRK-like family, member 6                                                         | -2.1 | SLITRK6-9:4                                                                    | *                                        | 88096247-88323218                                                                                                          | 86366922-86373483   | 13 |
| SSR3                | Signal sequence receptor, gamma (translocon-associated protein gamma)                       | 2.9  | SSR3-3:1<br>SSR3-3:2                                                           | **<br>2.2                                | 156470852-156534851<br>156465135-156534823                                                                                 | 156257929-156272973 | 3  |
| SUMF2               | Sulfatase modifying factor 2                                                                | 3.3  | SUMF2-2:1                                                                      | **                                       | 56560817-56564978                                                                                                          | 56131917-56148365   | 7  |
| TCF12               | Transcription factor 12                                                                     | -2.7 | TCF12-1:13                                                                     | *                                        | 57592563-57599959                                                                                                          | 57210833-57580716   | 15 |
| TMEM167B            | Transmembrane protein 167B                                                                  | 2.5  | TMEM167B-1:3                                                                   | 2.3                                      | 109642815-109643234                                                                                                        | 109633403-109639554 | 1  |
| TOB1                | Transducer of ERBB2, 1                                                                      | 2.1  | TOB1-2:1                                                                       | *                                        | 48986998-48987593                                                                                                          | 48939584-48941413   | 17 |
| TRMT112             | tRNA methyltransferase 11-2 homolog ( <i>S. cerevisiae</i> ); similar to CG12975            | 4.4  | TRMT112-2:1                                                                    | *                                        | 64161814-64163303                                                                                                          | 64084163-64085033   | 11 |
| USP3                | Ubiquitin specific peptidase 3                                                              | -2.5 | USP3-1:2                                                                       | 2.4                                      | 63682429-63729347                                                                                                          | 63796810-63883663   | 15 |
| WDR1                | WD repeat domain 1                                                                          | 2.3  | WDR1-1:1                                                                       | 5.0                                      | 10069713-10074643                                                                                                          | 10075963-10118573   | 4  |
| WDR74               | WD repeat domain 74                                                                         | 2.6  | WDR74-1:1<br>WDR74-1:12<br>WDR74-1:14<br>WDR74-1:22<br>WDR74-1:25<br>WDR74-1:4 | 9.3<br>6.0<br>2.5<br>2.5<br>-2.3<br>-2.3 | 62619730-62623386<br>62621840-62622960<br>62620826-62622960<br>62619460-62622708<br>62619520-62621168<br>62619460-62623339 | 62600383-62607628   | 11 |
| ZNF259              | Zinc finger protein 259                                                                     | 2.2  | ZNF259-1:1                                                                     | -2.5                                     | 116645826-116646592                                                                                                        | 116649276-116658739 | 11 |
| ZNF740              | Zinc finger protein 740                                                                     | 2.0  | ZNF740-1:1                                                                     | **                                       | 53553370-53554784                                                                                                          | 53574535-53584654   | 12 |

\* Only expressed in monolayers

\*\* only expressed in spheroids

<sup>1,2</sup> Genes of EIF2 signaling

<sup>1</sup> Genes of mTOR signaling

<sup>1,5,7</sup> Genes of regulation of EIF4 and p70S6K pathways

<sup>3</sup> Gen of cell cycle: G1/S Checkpoint and estrogen-mediated S-phase entry

<sup>4,6</sup> Genes of mitochondrial dysfunction and Oxidative phosphorylation pathways

<sup>5</sup> Genes Cell cycle by BTG,

<sup>5,7</sup> Genes PI3K/AKT pathways

<sup>7</sup> Genes of PTEN signaling

**Supplementary Table S7.** qRT-PCR validation of lncRNAs and mRNAs genes.

| GEN                 | Relative expression |         | p-value      | Validation method              |
|---------------------|---------------------|---------|--------------|--------------------------------|
|                     | qRT-PCR             | RNA-seq | qRT-PCR      |                                |
| lnc-AGBL1-4:1       | -19.69 ± 1.68       | -5.1    | 0.001        | Relative standard curve        |
| lnc-CAMK1G-1:2      | -2.77 ± 0.65        | -11.3   | 0.001        | Relative standard curve        |
| lnc-PPP2R4-4:1      | -1.57 ± 0.51        | -3.1    | 0.042        | Relative standard curve        |
| lnc-KIAA1755-5:3    | 0.57 ± 0.33         | -4.0    | <b>0.265</b> | Relative standard curve        |
| lnc-MLN-1:2         | 3.24 ± 1.12         | 23      | 0.022        | Relative standard curve        |
| lnc-IGSF5-1:1       | 1.75 ± 0.70         | 22      | 0.015        | Relative standard curve        |
| lnc-CPEB4-6:1       | 2.44 ± 1.02         | 19      | 0.030        | Relative standard curve        |
| ITGB6               | 0.15554072 ± 0.30   | -10.52  | 0.00147      | Comparative $\Delta\Delta C_T$ |
| ANKRD30A            | 0.144032353 ± 0.23  | *       | 0.00001      | Comparative $\Delta\Delta C_T$ |
| <b>MYC</b>          | 0.84319542 ± 0.22   | 4.4     | 0.0007       | Comparative $\Delta\Delta C_T$ |
| GAPDH               | 1.292590582 ± 0.15  | 2.65    | <b>0.406</b> | Comparative $\Delta\Delta C_T$ |
| p53                 | 1.555923172 ± 0.06  | 2.30    | 0.0015       | Comparative $\Delta\Delta C_T$ |
| HIST1H2AG           | 1.076666667 ± 0.17  | 4.49    | <b>0.06</b>  | Comparative $\Delta\Delta C_T$ |
| NDUFA1              | 3.494077936 ± 0.15  | 5.8     | 0.0008       | Comparative $\Delta\Delta C_T$ |
| COX8A               | 9.030698223 ± 0.16  | 5.74    | 0.013        | Comparative $\Delta\Delta C_T$ |
| lnc-GAPDH-2:1       | 3.07182457 ± 0.19   | **      | 0.028        | Comparative $\Delta\Delta C_T$ |
| lnc-HIST1H2AG-2:1   | 3.83134634 ± 0.08   | 8.0     | 0.041        | Comparative $\Delta\Delta C_T$ |
| <b>lnc-MYC-2:24</b> | 0.23693361 ± 0.22   | *       | 0.000004     | Comparative $\Delta\Delta C_T$ |
| <b>2:5</b>          |                     | **      |              |                                |
| <b>2:8</b>          |                     | 4.5     |              |                                |
| <b>2:9 isoforms</b> |                     | 2.2     |              |                                |

Genes \* only monolayer or \*\* only spheroids this was expressed

**Supplementary Table S8.** lncRNAs dysregulated with know function.

| <b>ID lncRNA<br/>LNCipedia<br/>(Ensembl)</b>                                            | <b>Disease</b>                                                                                                                              | <b>Description</b>                                                                                                                                                                                                                                                                                                                                                  | <b>Ref.</b> |
|-----------------------------------------------------------------------------------------|---------------------------------------------------------------------------------------------------------------------------------------------|---------------------------------------------------------------------------------------------------------------------------------------------------------------------------------------------------------------------------------------------------------------------------------------------------------------------------------------------------------------------|-------------|
| lnc-C22orf32-1                                                                          | Nasopharyngeal carcinoma (NPC)                                                                                                              | High levels of lnc-C22orf32-1 was found in the primary NPC tissues. This increase was associated with advanced tumor stages. High levels of lnc-C22orf32-1 were associated with the male patients *The differential expression of lncRNA observed in NPC might be attributed to epigenetic regulation including microRNA, DNA methylation, and histone modification | 1, 2        |
| lnc-MYC-2<br>(PVT1)                                                                     | Breast,<br>Ovarian Pancreas<br>Renal and Gastric<br>cáncer<br>Diabetes and other                                                            | e.g., Amplification of PVT1 contributes to the pathophysiology of ovarian and breast cancer.<br>*The lncRNA PVT1 interacts with MYC in the nucleus.                                                                                                                                                                                                                 | 1, 3*       |
| lnc-CPN2-1<br>(LINC00887)                                                               | Renal cell carcinoma (RCC)                                                                                                                  | lnc-CPN2-1 overexpression in RCC<br>Small interfering RNA (siRNA)-mediated knockdown of lnc-CPN2-1 did not influence cell proliferation                                                                                                                                                                                                                             | 4           |
| lnc-PPP2R4-5<br>(LINC01503)<br>lnc-FAM46A-1<br>(LINC01526)<br>lnc-MBL2-4<br>(LINC01468) | Tongue squamous cell carcinoma (SCC)                                                                                                        | These lncRNAs were upregulated in the microdissected tongue SCC tissues. High level of lnc-MBL2-4:3 was associated with the node positive tongue cancer patients<br>In addition, reduced expression of lnc-MBL2-4:3 in the cisplatin resistant HN21B cells                                                                                                          | 5           |
| lnc-HSCB-1<br>(TTC28-AS1)                                                               | HSCs (hematopoietic stem cell) and limphoid progenitor cells                                                                                | This lnc-RNA showed a strong co-expression with the BCR protein-coding gene.<br>*BCR can be considered as a candidate tumor suppressor gene which may be involved in meningioma pathogenesis                                                                                                                                                                        | 6,7*        |
| lnc-SERPINC1-1<br>(GAS5)                                                                | Breast, Renal cancer<br>B-cell neoplasms<br>*Kidney, Lymphoma<br>Melanoma, Prostata<br>Systemic lupus erythaematosus and autoimmune disease | e.g., GAS5 promoted the apoptosis of triple-negative and oestrogen receptor-positive cells but only dual PI3K/mTOR inhibition was able to enhance GAS5 levels in all cell types                                                                                                                                                                                     | 1, 8*       |
| lnc-DDX27-1<br>(ZFAS1)                                                                  | Breast and Ductal carcinoma                                                                                                                 | ZFAS1 show distinct patterns of expression during post-pubertal mammary Development.<br>ZFAS1 is a putative tumor suppressor gene.                                                                                                                                                                                                                                  | 1, 9        |
| lnc-C11orf89-2<br>(H19)                                                                 | Breast, bladder, cervical, adrenocortical cancer and other                                                                                  | Estrogen signaling increased the expression of <i>H19</i> and <i>ER<math>\alpha</math></i> . <i>H19</i> expression <i>also is</i> important for estrogen-induced luminal progenitor expansion.<br>*c-Myc and <i>H19</i> expression shows strong association in primary breast and lung carcinomas                                                                   | 1*, 10      |
| lnc-SCYL1-1<br>(MALAT1)                                                                 | Breast, cervical, bladder hepatocellular                                                                                                    | The MALAT1 level was significantly lower in tumor tissue compared to adjacent non-cancerous tissue in breast cancer. Downregulation of MALAT1 induced EMT.                                                                                                                                                                                                          | 11          |

|                             |                                                                                                         |                                                                                                                                                                                                                                                                                                 |       |
|-----------------------------|---------------------------------------------------------------------------------------------------------|-------------------------------------------------------------------------------------------------------------------------------------------------------------------------------------------------------------------------------------------------------------------------------------------------|-------|
|                             | carcinoma and other                                                                                     | Induction of EMT by MALAT1 downregulation may be mediated by the PI3K-AKT pathway                                                                                                                                                                                                               |       |
| lnc-DLK1-4 (MEG3)           | Breast, bladder cancer, Glioma                                                                          | MEG3a exhibited a strong ability to inhibit cell growth and proliferation in several human cancer cell lines, such HeLa, MCF-7, and H4.                                                                                                                                                         | 12    |
| lnc-NAP1L2-1 (XIST1)        | Breast, ovarian, bladder, testicular cancer and other                                                   | XIST typically is expressed by all female somatic cells, XIST expression has been found to be lost in female breast, ovarian, and cervical cancer cell lines.                                                                                                                                   | 13    |
| lnc-TMEM30B-4:1 (HIF1A-AS1) | *Non-small cell lung cancer (NSCLC), Kidney, Renal Oesophageal denocarcinoma and Cardiovascular disease | *The expression of XIST and HIF1A-AS1 in tumor tissues and serum of NSCLC was higher than that of the control group (nontumorous)                                                                                                                                                               | 1, 14 |
| lnc-ATXN7-8 (ADAMTS9-AS2)   | Glioma                                                                                                  | ADAMTS9-AS2 was downregulated in glioma tissue. Co-relationship of ADAMTS9-AS2 with ADAMTS9 and DNMT1. Overexpression of ADAMTS9-AS2 inhibited migration and invasion abilities of the T98G cells While knockdown opposite effect in U87 cells                                                  | 15    |
| lnc-TMEM60-1 (APTR)         | Glioblastoma                                                                                            | APTR represses <i>p21</i> transcription by recruiting the PRC2 complex to the <i>p21</i> promoter. APTR is important for G1-S transition most likely due to a requirement for the activity of CyclinE/CDK2 kinase                                                                               | 16    |
| lnc-METTL15-4 (BDNF-AS)     | Huntington's disease ( HD) Obesity, Schizophrenia Other                                                 | BDNF-AS and BDNF transcripts are Co-expressed in many tissues, which suggest BDNF-AS potential for regulation of BDNF mRNA in monkey and mouse tissues *BDNF-AS inhibits BDNF transcription by recruiting EZH2 to the BDNF promoter region and plays an important role in the development of HD | 1, 17 |
| lnc-EMX2-4 (CASC2)          | Glioma, endometrial, colorectal cancer and Melanoma, renal carcinoma                                    | CASC2 was lowly expressed in glioma tissues. Overexpression of CAS2 inhibited proliferation, migration, and invasion, and promoted cell apoptosis. Up-regulated CASC2 decreased the expression of miR-2.                                                                                        | 1,18  |
| lnc-RPLP1-1 (DRAIC)         | Prostate cancer                                                                                         | Prostate cancer is accompanied by a decrease of FOXA1 and NKX3-1, which leads to the decrease of tumor-suppressive lncRNAs, DRAIC and PCAT29.                                                                                                                                                   | 19    |
| lnc-CHIC1-3 (JPX)           | Embryonic stem cell (ES)                                                                                | <i>Jpx</i> expression increases during ES cell differentiation and remained elevated in somatic cells <i>Xist</i> is controlled by two parallel RNA switches – Tsix for Xa and Jpx for Xi. Whereas Tsix represses <i>Xist</i> on Xa, Jpx activates <i>Xist</i> on Xi                            | 20    |
| lnc-LPAR6-1 (LINC00441)     | Lung carcinoma cell                                                                                     | A549 cells shows a predominantly nuclear localization of ncRNA-RB1 ( LINC00441). This lncRNA no effects on RB1 transcript or protein levels, suggesting that the two transcripts do not regulate each other. Transcriptional regulation of CALR expression by ncRNA-RB1                         | 21    |
| lnc-MAF-2 (MAFTRR)          | T and B lymphocyte                                                                                      | High expression of linc-MAF-4 correlated with a low amount of MAF transcript in CD4 <sup>+</sup> T <sub>H</sub> 1 cells, conversely T <sub>H</sub> 2 cells had low expression of linc-MAF-4 and abundant MAF transcripts.                                                                       | 22    |

|                                  |                                                                                                                  |                                                                                                                                                                                                                                                                                                                                     |        |
|----------------------------------|------------------------------------------------------------------------------------------------------------------|-------------------------------------------------------------------------------------------------------------------------------------------------------------------------------------------------------------------------------------------------------------------------------------------------------------------------------------|--------|
| lnc-TRAF5-1<br>(LINC00467)       | Neuroblastoma                                                                                                    | Linc00467 suppressed the expression of its downstream protein-coding gene RD3, and induced neuroblastoma cell survival by reducing the expression of the tumour suppressor gene DKK1<br>Down-regulation of N-Myc expression resulted in increased linc00467 expression.                                                             | 23     |
| lnc-YBEY-2<br>(MCM3AP-AS1)       | Human B-cell                                                                                                     | This lncRNA were enriched in the nucleus and were upregulated in high MYC expression.<br>MYC binding was enriched at the promoter of these lncRNA                                                                                                                                                                                   | 24     |
| lnc-NEDD1-4<br>(RMST)            | Brain<br>*Rhabdomyosarcoma                                                                                       | <i>RMST</i> associates with SOX2, one of the most important transcription factors controlling neural stem cell (NSC) fate<br>Knockdown of <i>RMST</i> prevented neuronal differentiation                                                                                                                                            | 1*, 25 |
| lnc-ABCB4-1<br>(TP53TG1)         | Colon cancer                                                                                                     | Under conditions of cellular stress (ultraviolet irradiation or exposure to bleomycin or cisplatin), expression of TP53TG1 was induced in a wild-type TP53-dependent manner                                                                                                                                                         | 26     |
| lnc-OSBP2-2<br>(TUG1)            | MCF-7 and HeLa cells<br>B-cell neoplasms<br>bladder cancer<br>non-small cell lung cancer<br>Huntington's disease | *Under genotoxic stress-induced apoptosis in HeLa and MCF-7 cells TUG1, UCA1, and PANDA not affected.<br>Cell proliferation inhibition and apoptosis induction were observed in TUG1 siRNA-transfected bladder urothelial carcinoma T24 and 5637 cells.                                                                             | 1, 27  |
| lnc-HEATR6-1<br>(WFDC21P)        | Dendritic cells                                                                                                  | lnc-D (WFDC21P), was exclusively expressed in human conventional dendritic cells (DCs).<br>Knockdown of lnc-DC impaired DC differentiation from human monocytes and mouse bone marrow cells and reduced capacity of DCs to stimulate T cell activation. Lnc-DC mediated these effects by activating the transcription factor STAT3. | 28     |
| lnc-TGFBR2-1<br>(RP11-1024P17.1) | Vascular disease.                                                                                                | This lncRNA could to be implicated in proliferation and migration of vascular smooth muscle cells (VSMCs)                                                                                                                                                                                                                           | 29     |

## References.

- 1 Chen, G. *et al.* LncRNADisease: a database for long-non-coding RNA-associated diseases. *Nucleic Acids Res* **41**, D983-986, doi:10.1093/nar/gks1099 (2013).
- 2 Gao, W., Chan, J. Y. & Wong, T. S. Differential expression of long noncoding RNA in primary and recurrent nasopharyngeal carcinoma. *Biomed Res Int* **2014**, 404567 (2014).
- 3 Colombo, T., Farina, L., Macino, G. & Paci, P. PVT1: a rising star among oncogenic long noncoding RNAs. *Biomed Res Int* **2015**, 304208 (2015).
- 4 Deng, M. *et al.* Identification of novel differentially expressed lncRNA and mRNA transcripts in clear cell renal cell carcinoma by expression profiling. *Genom Data* **5**, 173-175 (2015).
- 5 Gao, W., Chan, J. Y. & Wong, T. S. Long non-coding RNA deregulation in tongue squamous cell carcinoma. *Biomed Res Int* **2014**, 405860 (2014).
- 6 Wozniak, K. *et al.* BCR expression is decreased in meningiomas showing loss of heterozygosity of 22q within a new minimal deletion region. *Cancer Genet Cytogenet* **183**, 14-20 (2008).

- 7 Casero, D. *et al.* Long non-coding RNA profiling of human lymphoid progenitor cells reveals transcriptional divergence of B cell and T cell lineages. *Nat Immunol* **16**, 1282-1291 (2015).
- 8 Qiao, H. P., Gao, W. S., Huo, J. X. & Yang, Z. S. Long non-coding RNA GAS5 functions as a tumor suppressor in renal cell carcinoma. *Asian Pac J Cancer Prev* **14**, 1077-1082 (2013).
- 9 Shore, A. N., Herschkowitz, J. I. & Rosen, J. M. Noncoding RNAs involved in mammary gland development and tumorigenesis: there's a long way to go. *J Mammary Gland Biol Neoplasia* **17**, 43-58 (2012).
- 10 Basak, P. *et al.* Estrogen regulates luminal progenitor cell differentiation through H19 gene expression. *Endocr Relat Cancer* **22**, 505-517 (2015).
- 11 Xu, S. *et al.* Downregulation of long noncoding RNA MALAT1 induces epithelial-to-mesenchymal transition via the PI3K-AKT pathway in breast cancer. *Int J Clin Exp Pathol* **8**, 4881-4891 (2015).
- 12 Zhang, X. *et al.* A pituitary-derived MEG3 isoform functions as a growth suppressor in tumor cells. *J Clin Endocrinol Metab* **88**, 5119-5126 (2003).
- 13 Weakley, S. M., Wang, H., Yao, Q. & Chen, C. Expression and function of a large non-coding RNA gene XIST in human cancer. *World J Surg* **35**, 1751-1756 (2011).
- 14 Tantai, J., Hu, D., Yang, Y. & Geng, J. Combined identification of long non-coding RNA XIST and HIF1A-AS1 in serum as an effective screening for non-small cell lung cancer. *Int J Clin Exp Pathol* **8**, 7887-7895 (2015).
- 15 Yao, J. *et al.* A new tumor suppressor lncRNA ADAMTS9-AS2 is regulated by DNMT1 and inhibits migration of glioma cells. *Tumour Biol* **35**, 7935-7944 (2014).
- 16 Negishi, M. *et al.* A new lncRNA, APTR, associates with and represses the CDKN1A/p21 promoter by recruiting polycomb proteins. *PLoS One* **9**, e95216 (2014).
- 17 Modarresi, F. *et al.* Inhibition of natural antisense transcripts in vivo results in gene-specific transcriptional upregulation. *Nat Biotechnol* **30**, 453-459 (2012).
- 18 Wang, P. *et al.* Long non-coding RNA CASC2 suppresses malignancy in human gliomas by miR-21. *Cell Signal* **27**, 275-282 (2015).
- 19 Sakurai, K., Reon, B. J., Anaya, J. & Dutta, A. The lncRNA DRAIC/PCAT29 Locus Constitutes a Tumor-Suppressive Nexus. *Mol Cancer Res* **13**, 828-838 (2015).
- 20 Tian, D., Sun, S. & Lee, J. T. The long noncoding RNA, Jpx, is a molecular switch for X chromosome inactivation. *Cell* **143**, 390-403 (2010).
- 21 Musahl, A. S. *et al.* A long non-coding RNA links calreticulin-mediated immunogenic cell removal to RB1 transcription. *Oncogene* **34**, 5046-5054 (2015).
- 22 Ranzani, V. *et al.* The long intergenic noncoding RNA landscape of human lymphocytes highlights the regulation of T cell differentiation by linc-MAF-4. *Nat Immunol* **16**, 318-325 (2015).
- 23 Atmadibrata, B. *et al.* The novel long noncoding RNA linc00467 promotes cell survival but is down-regulated by N-Myc. *PLoS One* **9**, e88112 (2014).
- 24 Hart, J. R., Roberts, T. C., Weinberg, M. S., Morris, K. V. & Vogt, P. K. MYC regulates the non-coding transcriptome. *Oncotarget* **5**, 12543-12554 (2014).
- 25 Ng, S. Y., Bogu, G. K., Soh, B. S. & Stanton, L. W. The long noncoding RNA RMST interacts with SOX2 to regulate neurogenesis. *Mol Cell* **51**, 349-359 (2013).

- 26 Takei, Y., Ishikawa, S., Tokino, T., Muto, T. & Nakamura, Y. Isolation of a novel TP53 target gene from a colon cancer cell line carrying a highly regulated wild-type TP53 expression system. *Genes Chromosomes Cancer* **23**, 1-9 (1998).
- 27 Ozgur, E. *et al.* Differential expression of long non-coding RNAs during genotoxic stress-induced apoptosis in HeLa and MCF-7 cells. *Clin Exp Med* **13**, 119-126 (2013).
- 28 Wang, P. *et al.* The STAT3-binding long noncoding RNA Inc-DC controls human dendritic cell differentiation. *Science* **344**, 310-313 (2014).
- 29 Li, J. *et al.* A bioinformatics method for predicting long noncoding RNAs associated with vascular disease. *Sci China Life Sci* **57**, 852-857 (2014).



**Supplementary Table S9.** qPCR quantification for transfection of lncRNAs and the relationship of lncRNA overexpressed with its nearby coding gene (mRNA).

| lncRNAs neighbor mRNA                               | lncRNAs<br>Fold difference (log <sub>2</sub> ) |              | p-value | mRNAs<br>Fold difference (log <sub>2</sub> ) |             | p-value  |
|-----------------------------------------------------|------------------------------------------------|--------------|---------|----------------------------------------------|-------------|----------|
|                                                     | VEC -                                          | VEC+         |         | VEC -                                        | VEC +       |          |
| <i>lncRNA / mRNA</i>                                |                                                |              |         |                                              |             |          |
| lnc-GAPDH-2:1/<br>mRNA GAPDH                        | -5.75 ± 0.23                                   | 5.82 ± 0.16  | 0.00006 | -1.77 ± 0.19                                 | 1.78 ± 0.17 | 0.000007 |
| lnc-HIST1H2AG-2:1/<br>mRNA HIST1H2AG                | -14.68 ± 0.30                                  | 15.00 ± 0.22 | 0.00007 | -1.90 ± 0.22                                 | 2.05 ± 0.16 | 0.00026  |
| lnc-MYC-2:24, 2:5,<br>2.8,2:9 isoforms/<br>mRNA MYC | -13.44 ± 0.21                                  | 13.38 ± 0.36 | 0.00002 | -1.08 ± 0.26                                 | 2.70 ± 0.24 | 0.00045  |

*VEC-* Empty vector and *VEC +* plasmid transfection with lncRNAs

**A**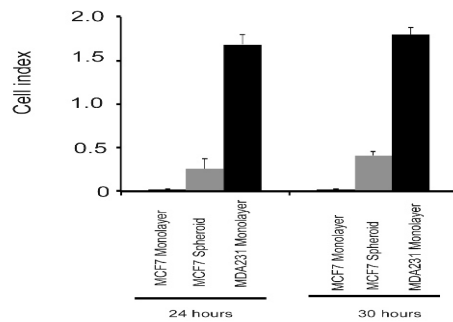**B**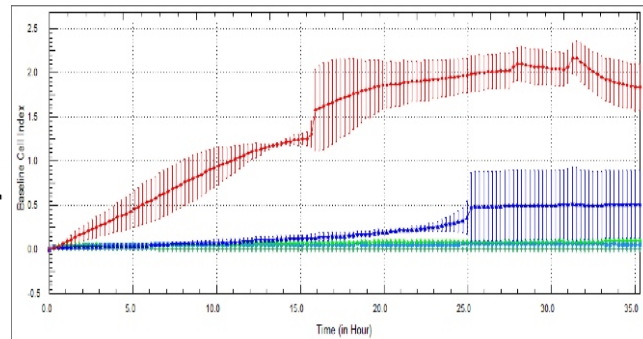

**Supplementary Figure S1.** Real time MCF-7 monolayers and spheroids disaggregated migration data. **(A)** Results from an RTCA migration assay conducted with FBS in the bottom chamber of a CIM plate well. MCF-7 monolayers cell and spheroids disaggregated cells migration is compared to MDA-MB-231 (Positive control). Results are shown as mean  $\pm$  SD Cell Index from triplicate wells at the 24 and 30 h time point **(B)** xCELLigence plots representative. MDA-MB-231 in red, spheroids disaggregated in blue and monolayers cell in green, Light colored lines representing conducted without SBF.

# A

EIF2 Signaling

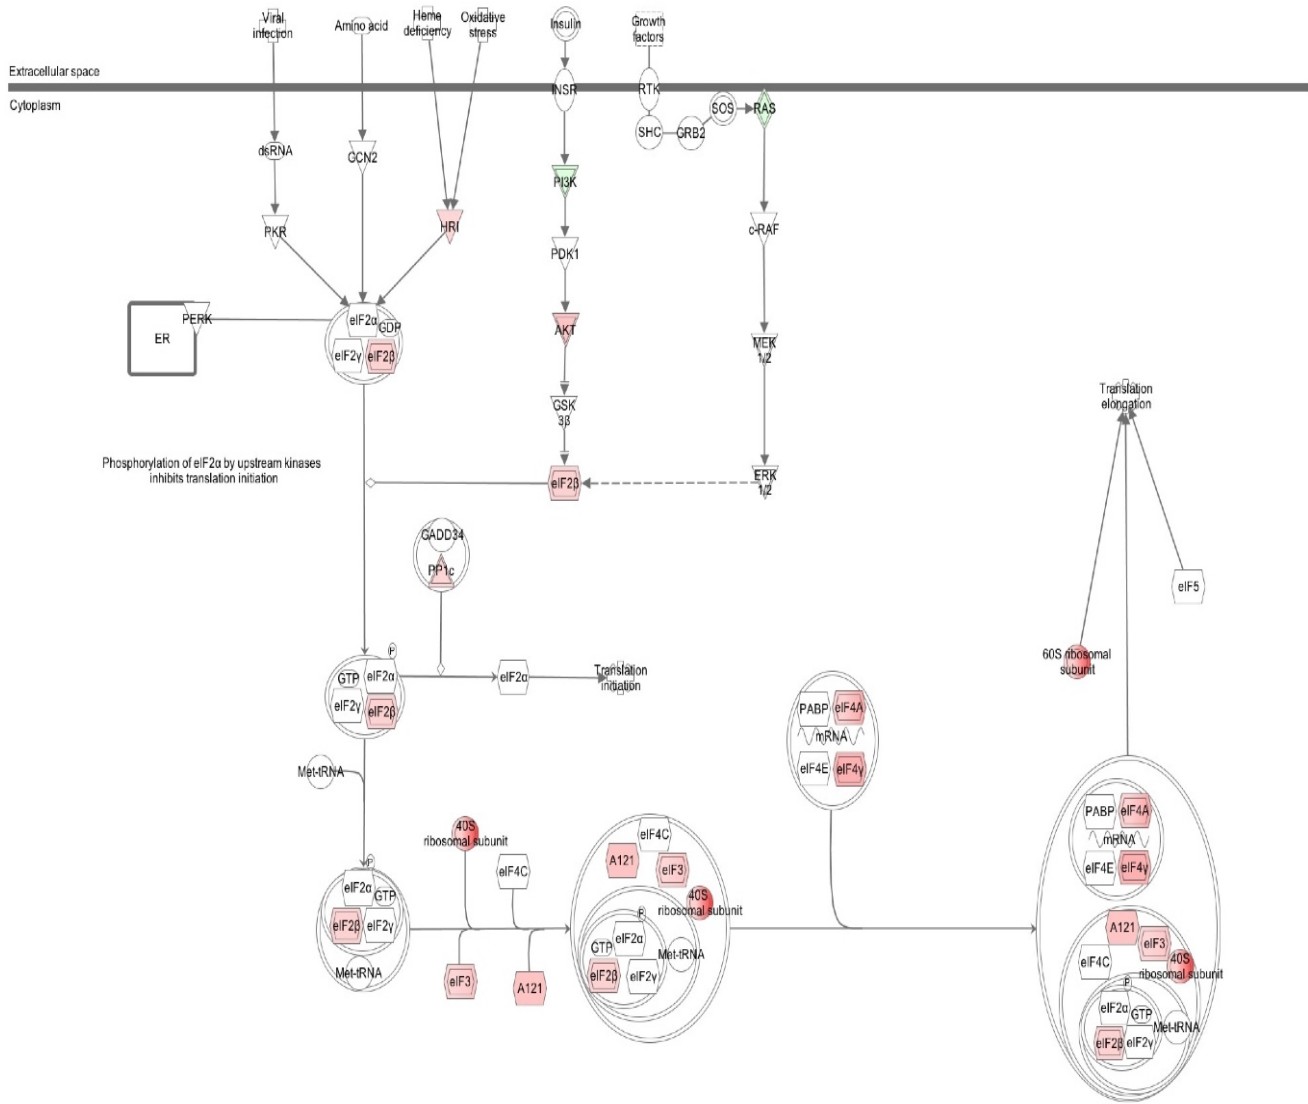

# B

## Regulation of eIF4 and p70S6K Signaling

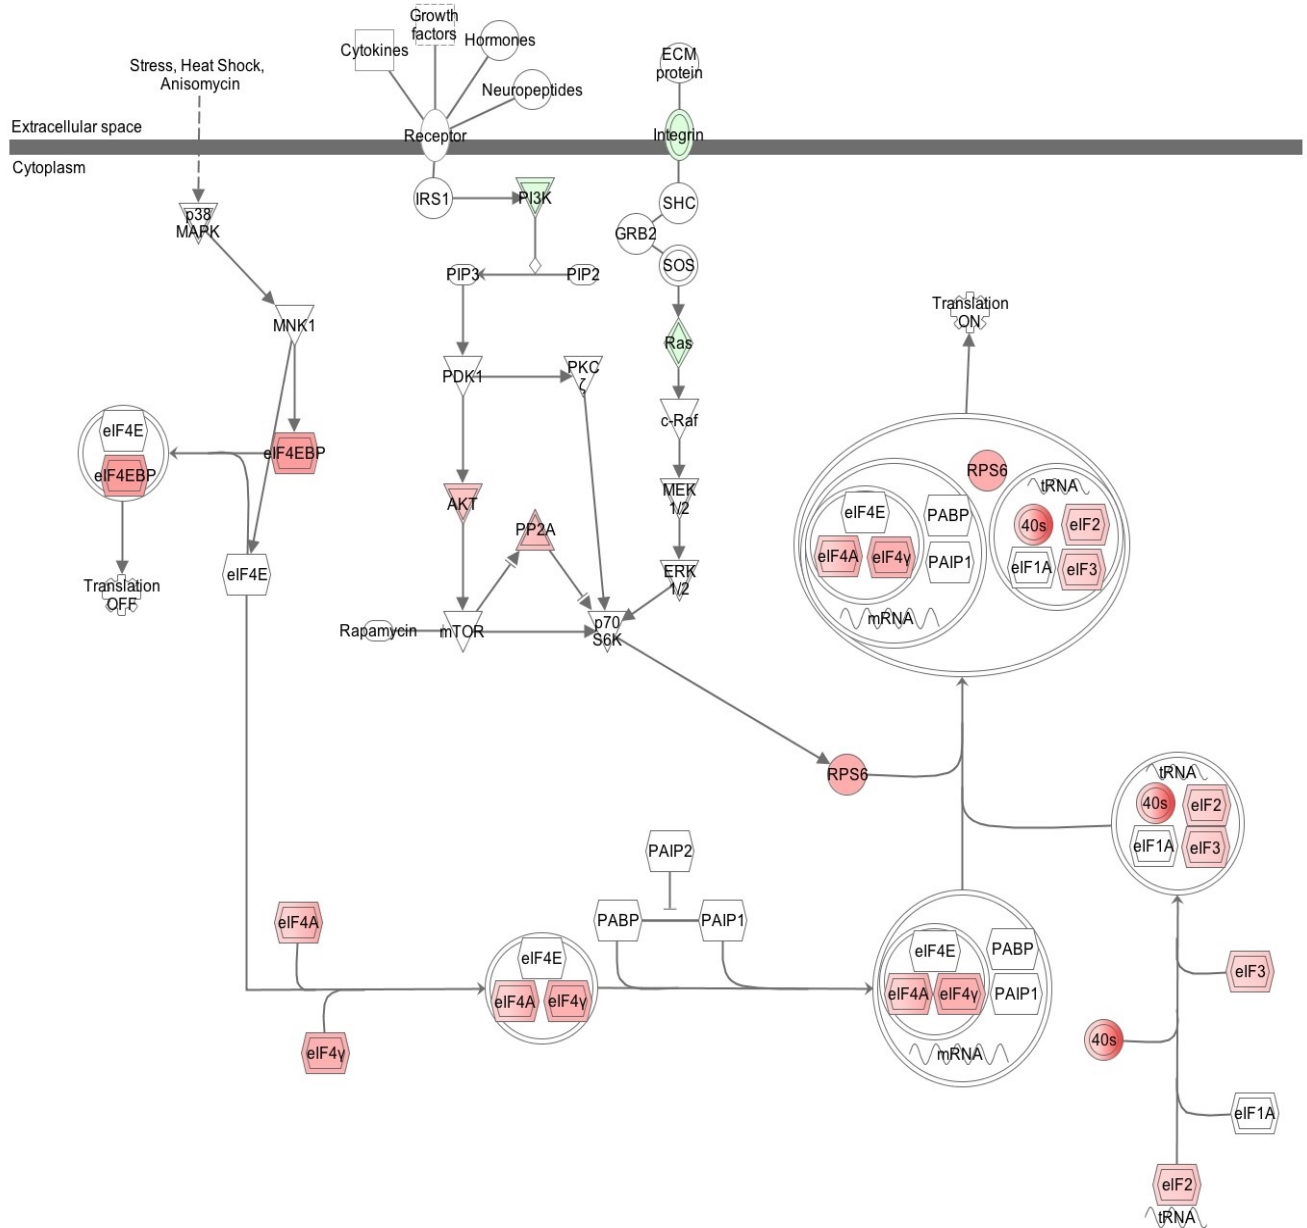

# C

## mTOR Signaling

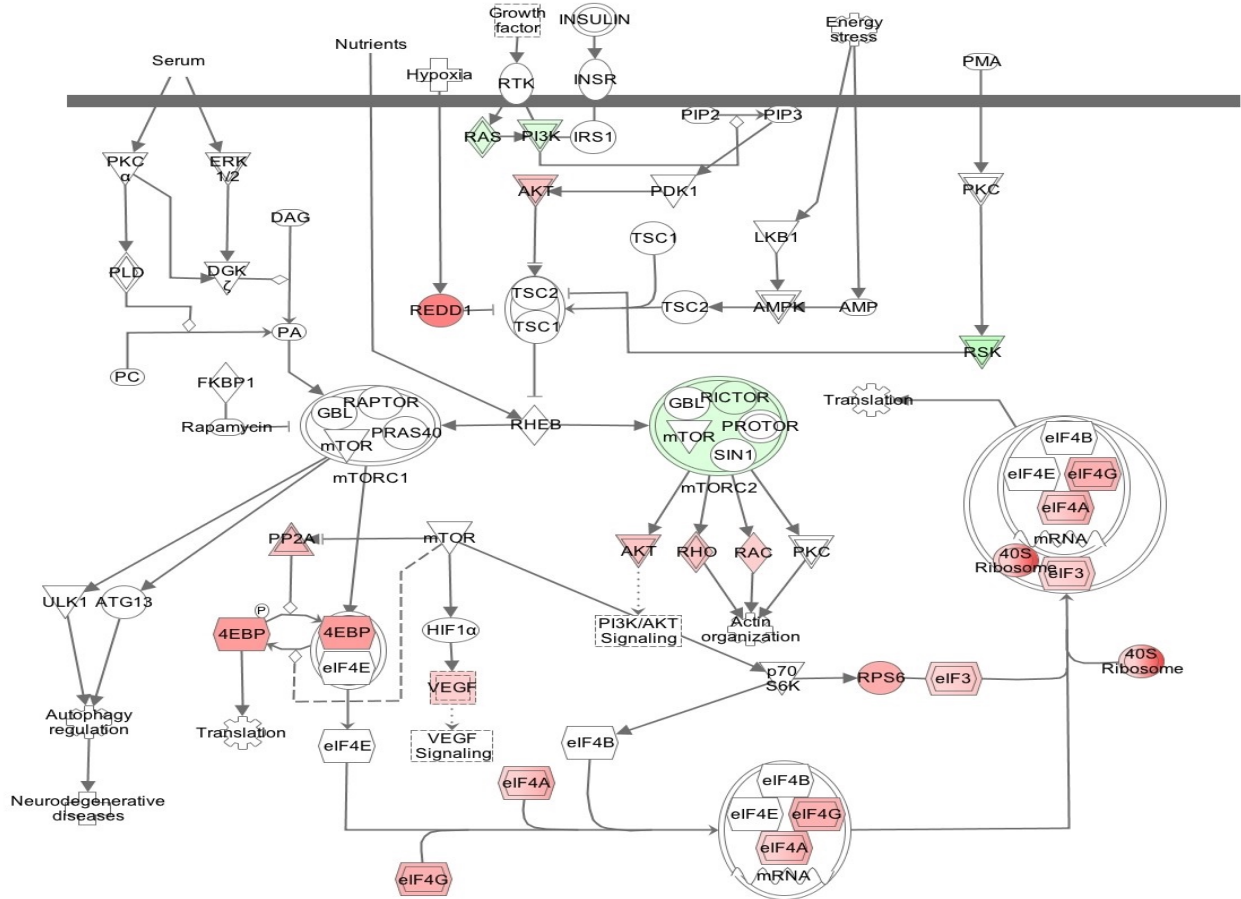

# D

## Oxidative Phosphorylation

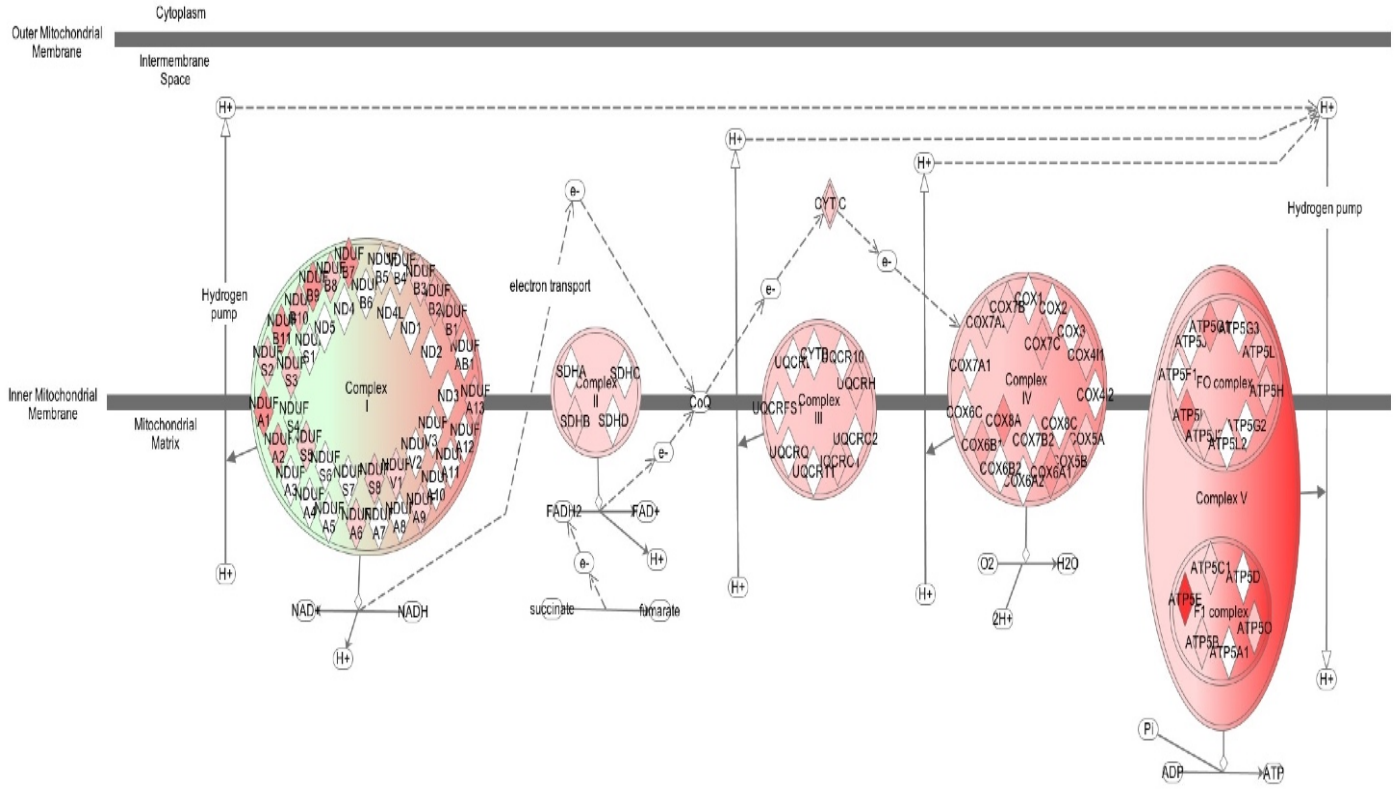

# E

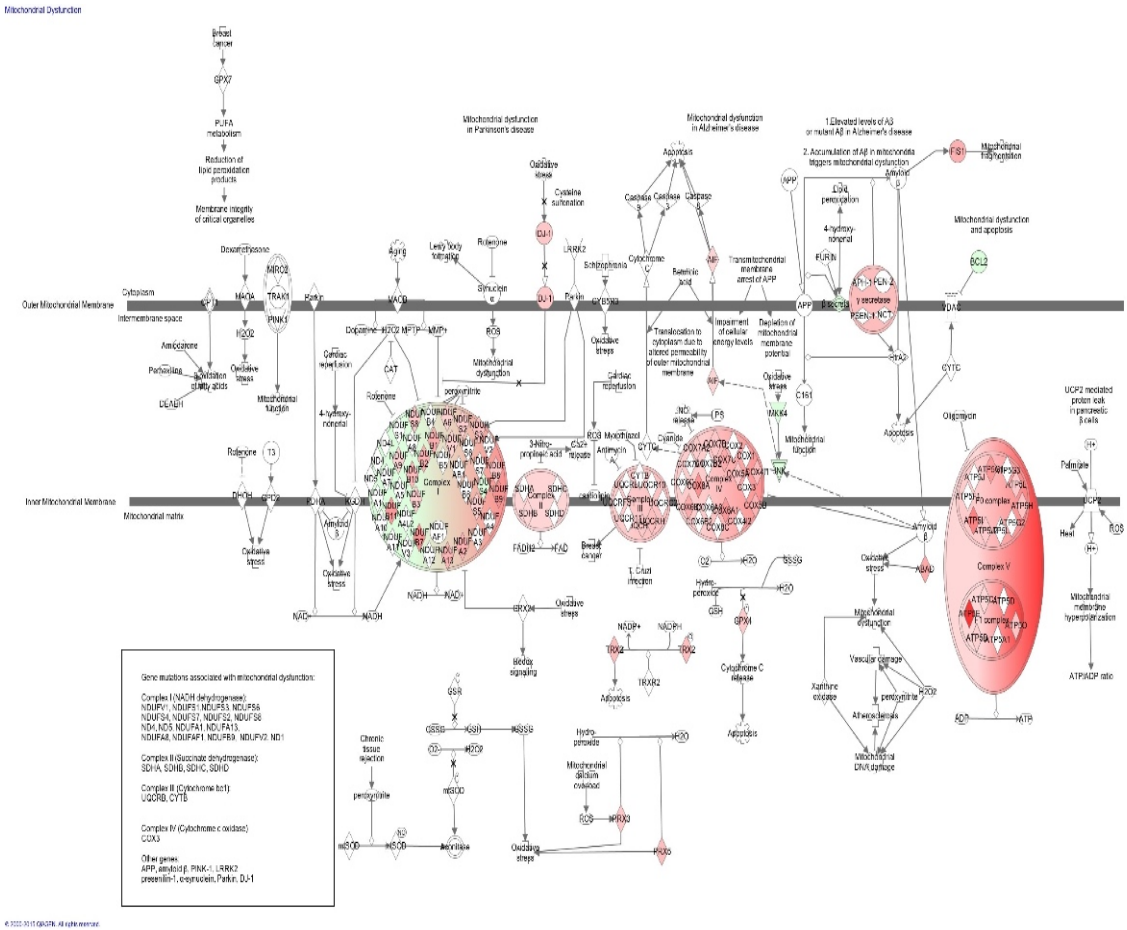

**Supplementary Figure S2.** The top five dysregulated canonical pathways (IPA). (A) EIF2 Signaling, (B) Regulation of eIF4 and p70S6K Signaling, (C) mTOR Signaling, (D) Oxidative Phosphorylation and (E) Mitochondrial Dysfunction. *Relationships, molecules shapes and genes with synonyms or group genes in pathways see chart following*

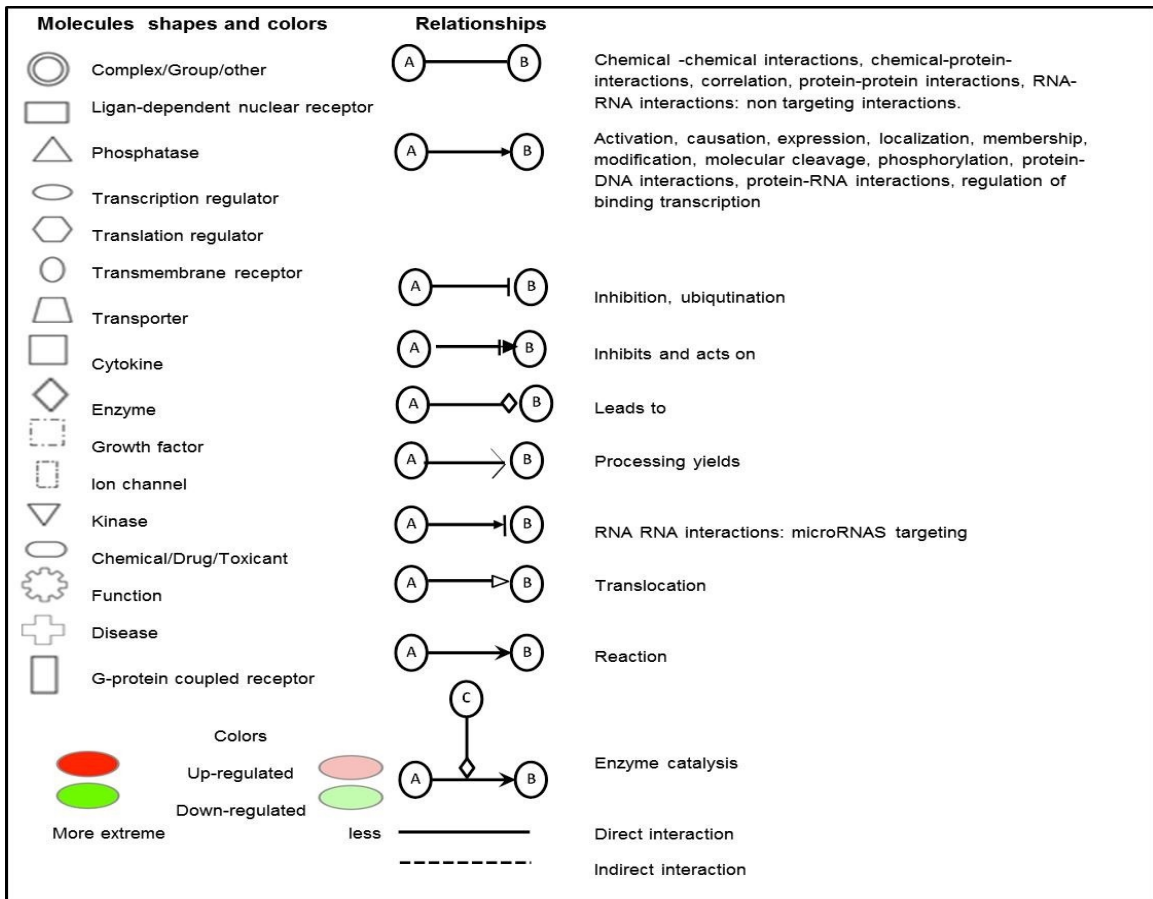



### Genes with synonyms or group genes in pathways IPA

| Name gen                                           | Name gen image pathways IPA    |
|----------------------------------------------------|--------------------------------|
| All RPS                                            | 40S ribosomal subunit          |
| All RPL                                            | 60S ribosomal subunit          |
| APH1A                                              | $\gamma$ -secretase            |
| BACE2                                              | $\beta$ -secretase             |
| BMPR2                                              | GFR                            |
| CDKN1B                                             | p27Kip1                        |
| CYC1                                               | CYT C or complex III           |
| DDIT4                                              | REDD1                          |
| EIF1                                               | A121                           |
| E2F4                                               | E2F                            |
| EIF1, EIF2B2 and EIF2B5                            | eIF2                           |
| EIF2AK1                                            | HRI                            |
| EIF2B2 and EIF2B5                                  | eIF2 $\beta$                   |
| EIF3B, EIF3C, EIF3D, EIF3G, EIF3I, EIF3K and EIF3L | eIF3                           |
| EIF4A1, EIF4A2 and EIF4A3                          | eIF4A                          |
| EIF4EBP1                                           | 4EBP or 4E-BP1 or eIF4BP       |
| EIF4G1                                             | eIF4 $\gamma$ and eIF4G        |
| FAU                                                | RPS30 of 40S ribosomal subunit |
| INPPL1                                             | SHIP                           |
| ITGA2                                              | Integrin                       |
| ITGB6 and ITGB5                                    | $\beta$ -Integrin              |
| LMNA                                               | Lamin A                        |
| MAP2K4                                             | MKK4 or JNK                    |
| MCRS1                                              | MSP58                          |
| PA2G4                                              | EBP1                           |
| PARK7                                              | DJ-1                           |
| PIK3CA                                             | PI3K                           |
| PPP2R4 and PPP2R1A                                 | PP2A                           |
| RND3                                               | RHO                            |
| RPS6KA3                                            | RSK                            |
| TXN2                                               | TRX2                           |

# A

## Cell Cycle: G1/S Checkpoint Regulation

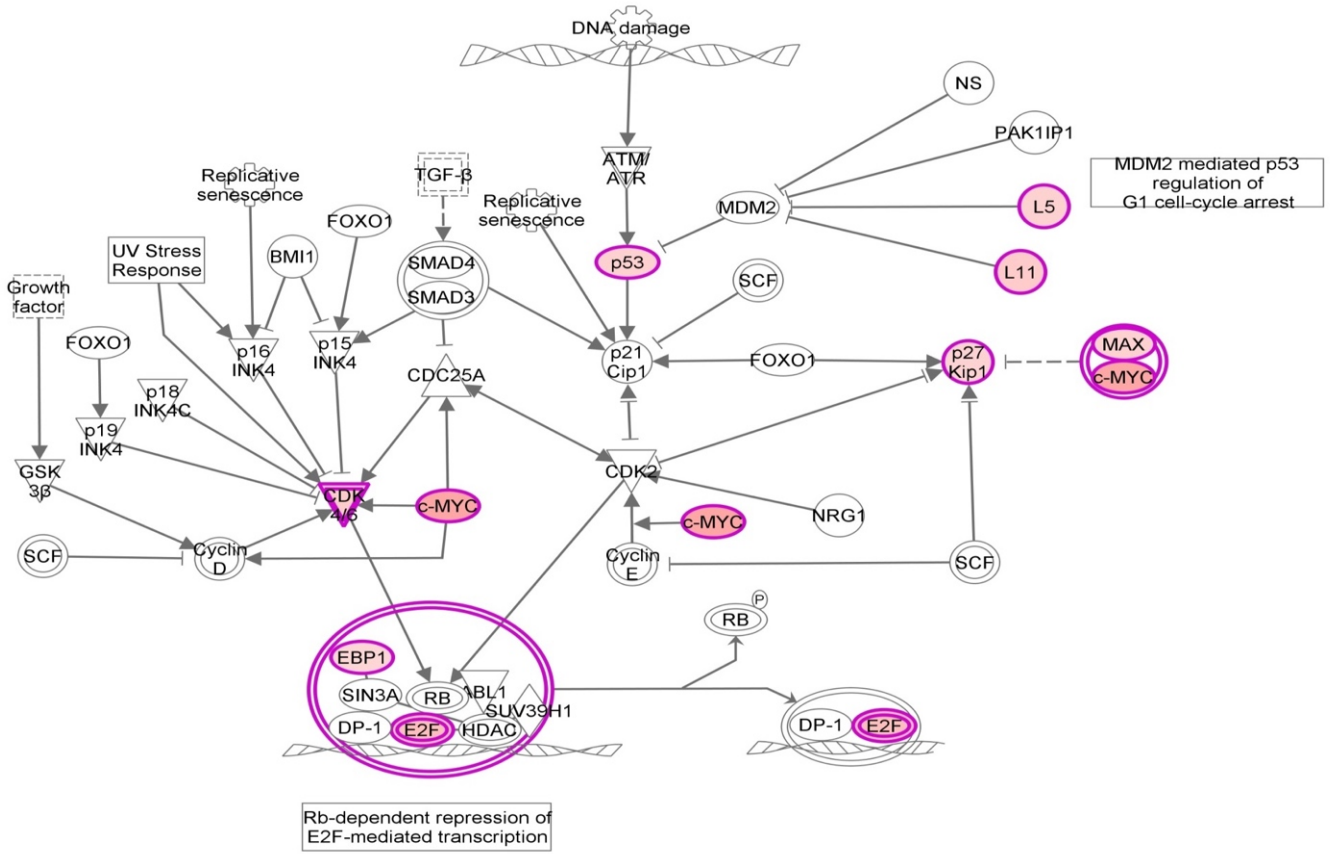

# B

## Estrogen-mediated S-phase Entry

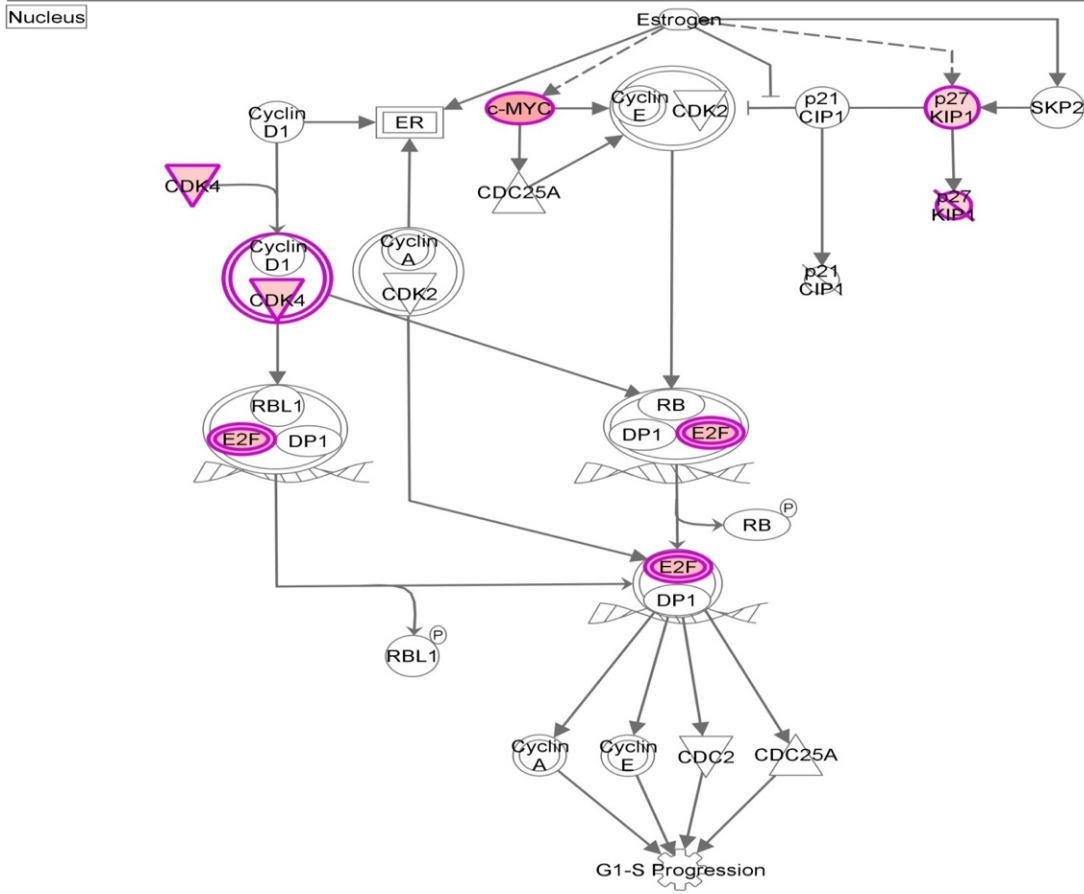

# C

## Cell Cycle Regulation by BTG Family Proteins

Nucleus

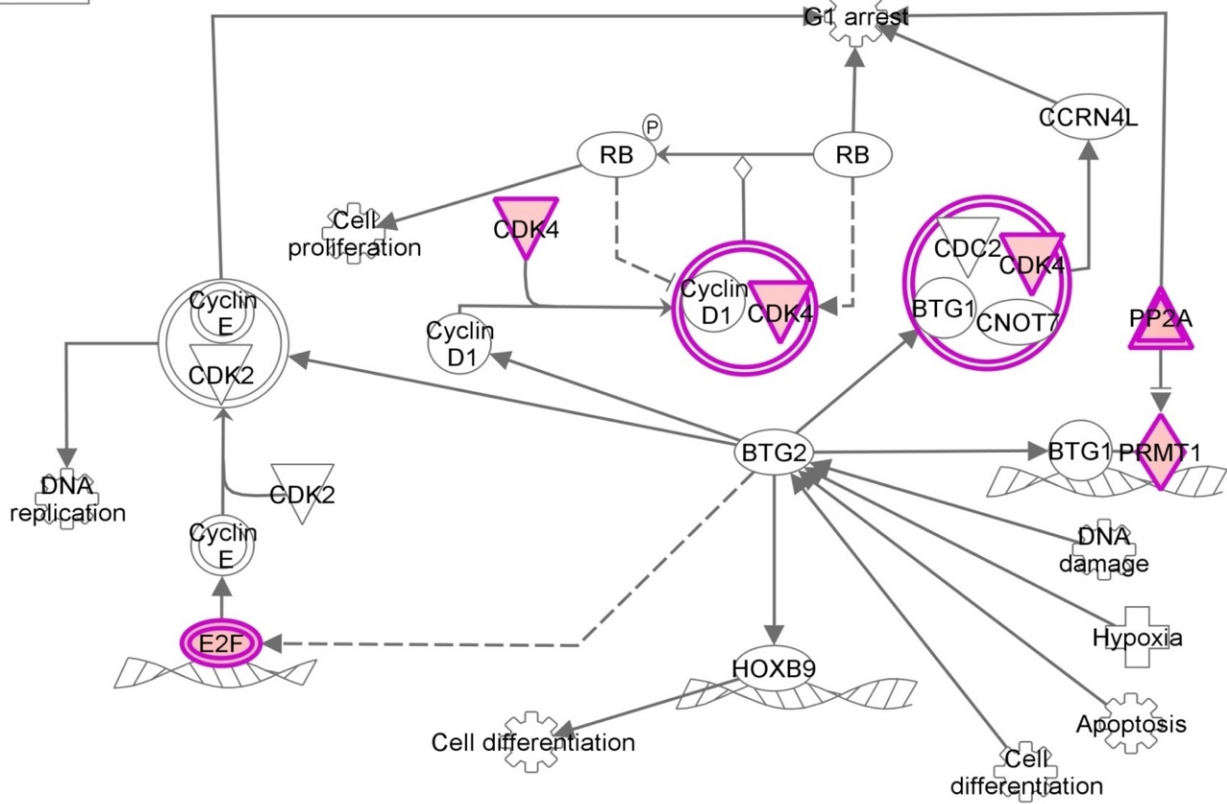

# D

## PTEN Signaling

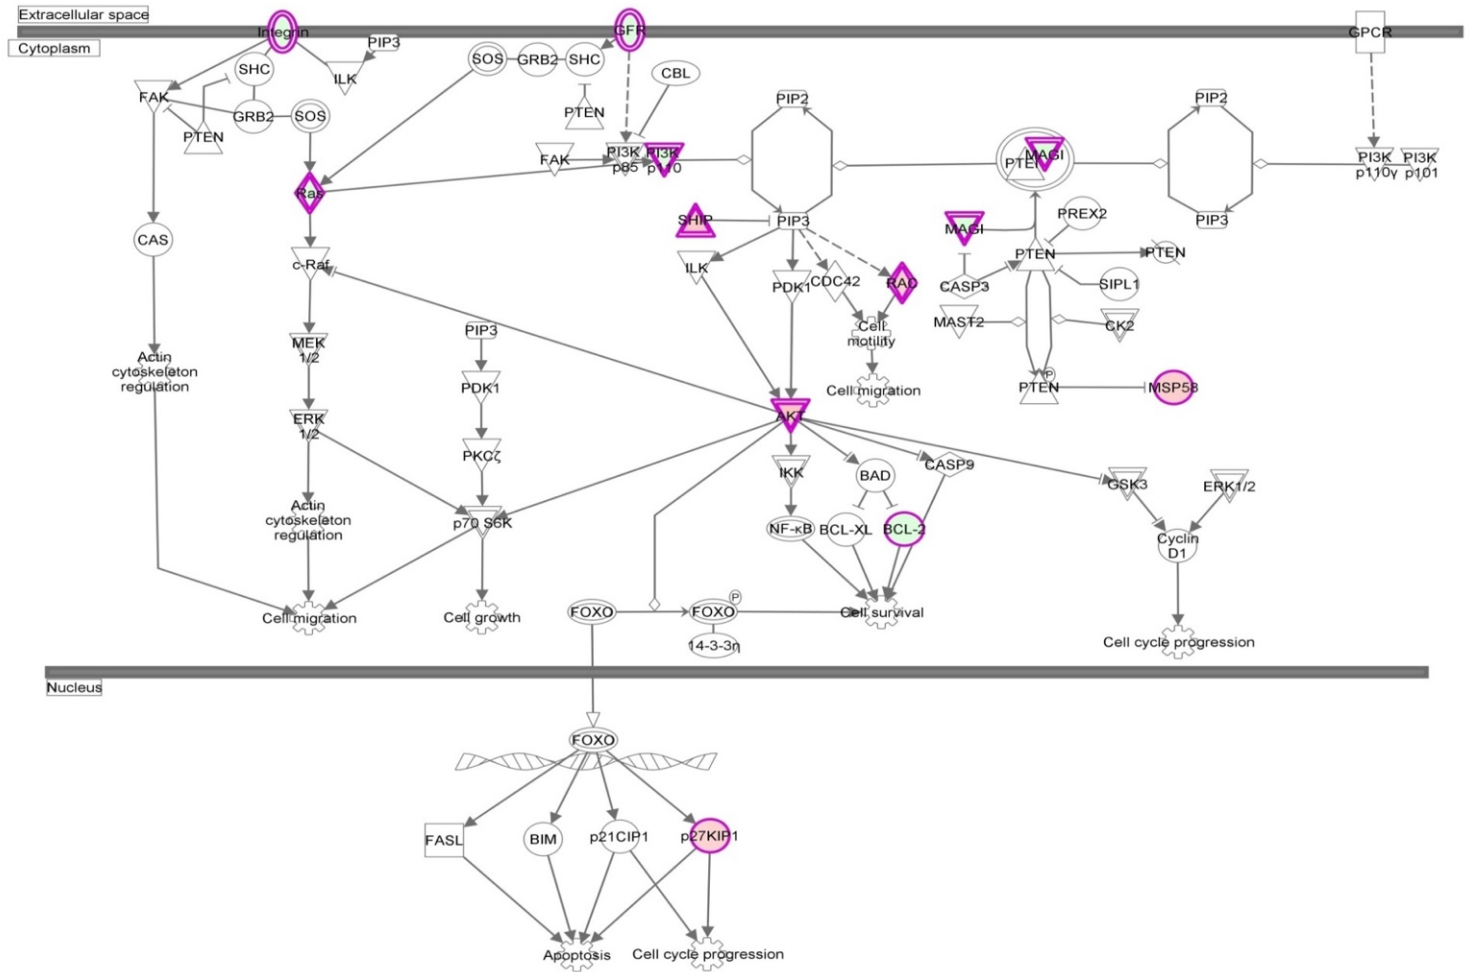

# E

## PI3K/AKT Signaling

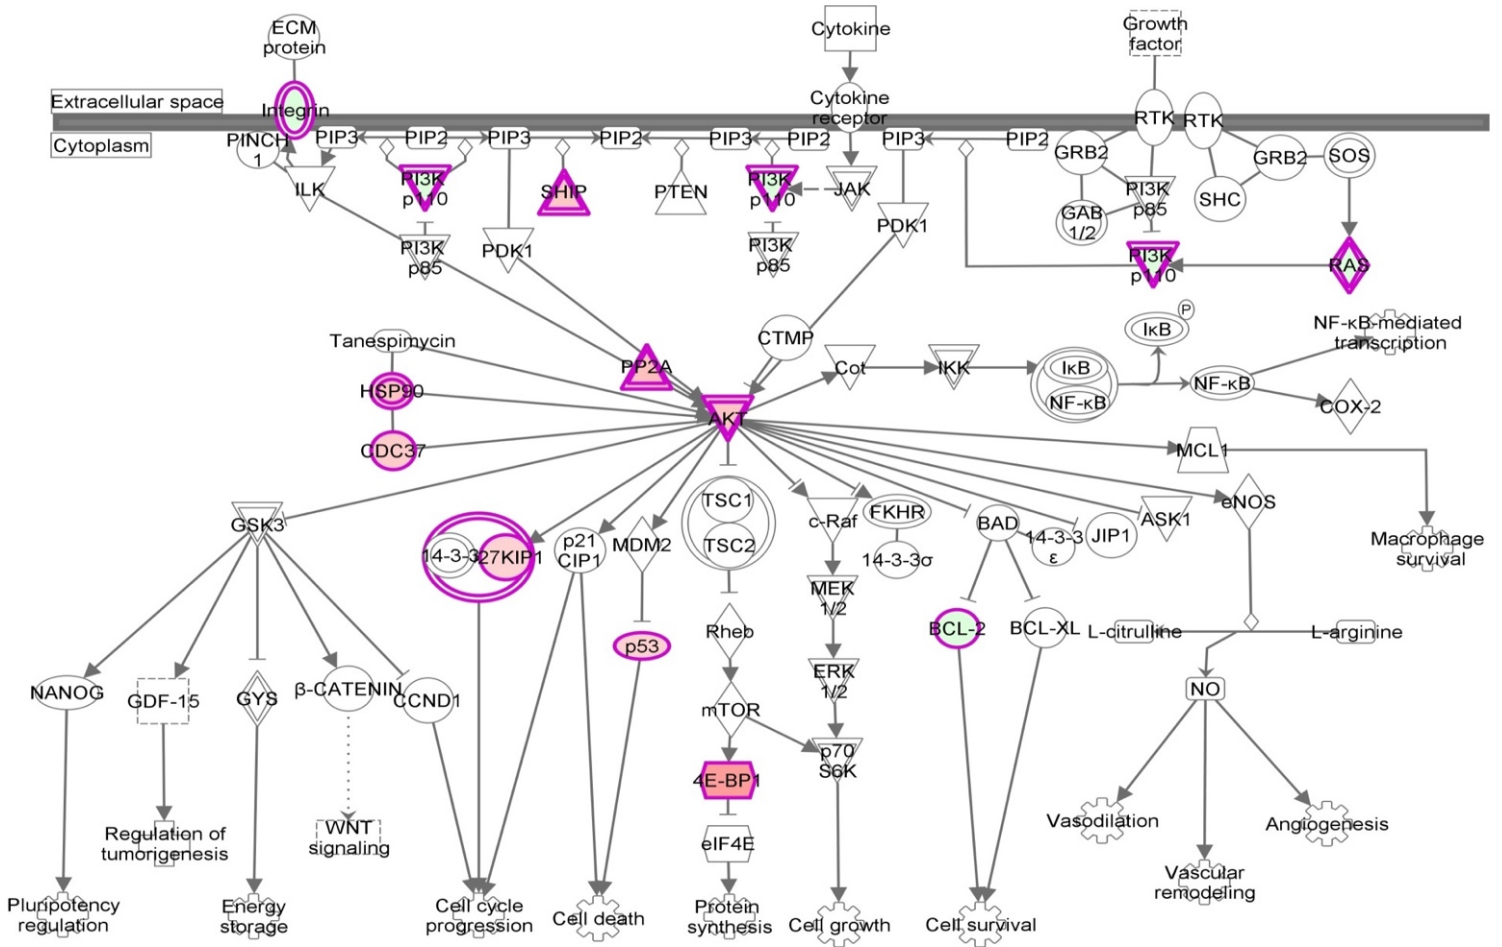

# F

## HER-2 Signaling in Breast Cancer

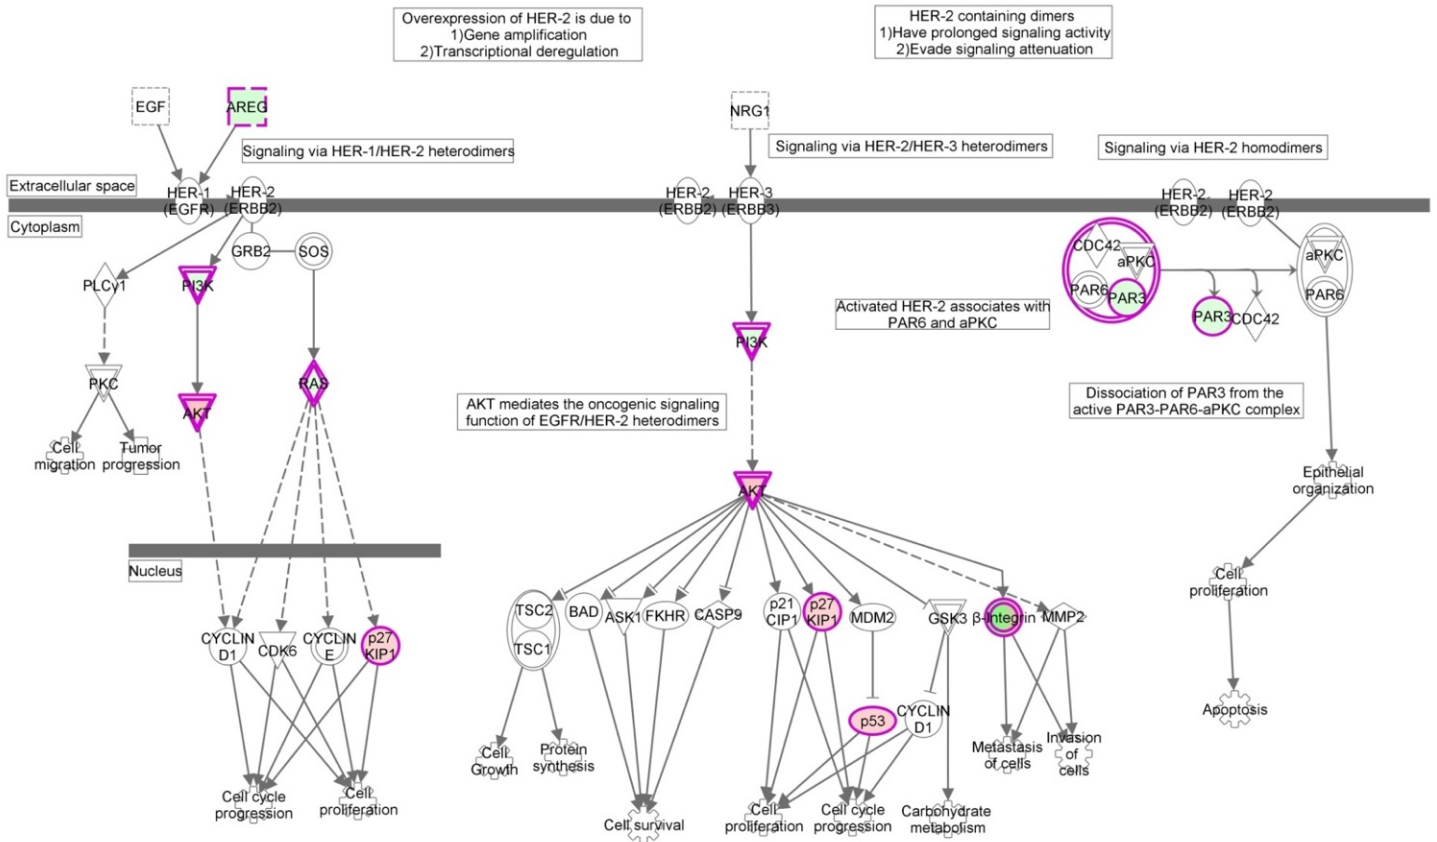

**Supplementary Figure S3.** Some interesting pathways associated with the cell cycle (IPA). (A) cell cycle G1/S checkpoint regulation, (B) Estrogen-mediated S-phase entry, (C) cell cycle regulation by BTG family protein, (D) PTEN signaling, (E) PI3K/AKT signaling and (F) HER-2 signaling in breast cancer

# A

Protein Ubiquitination Pathway

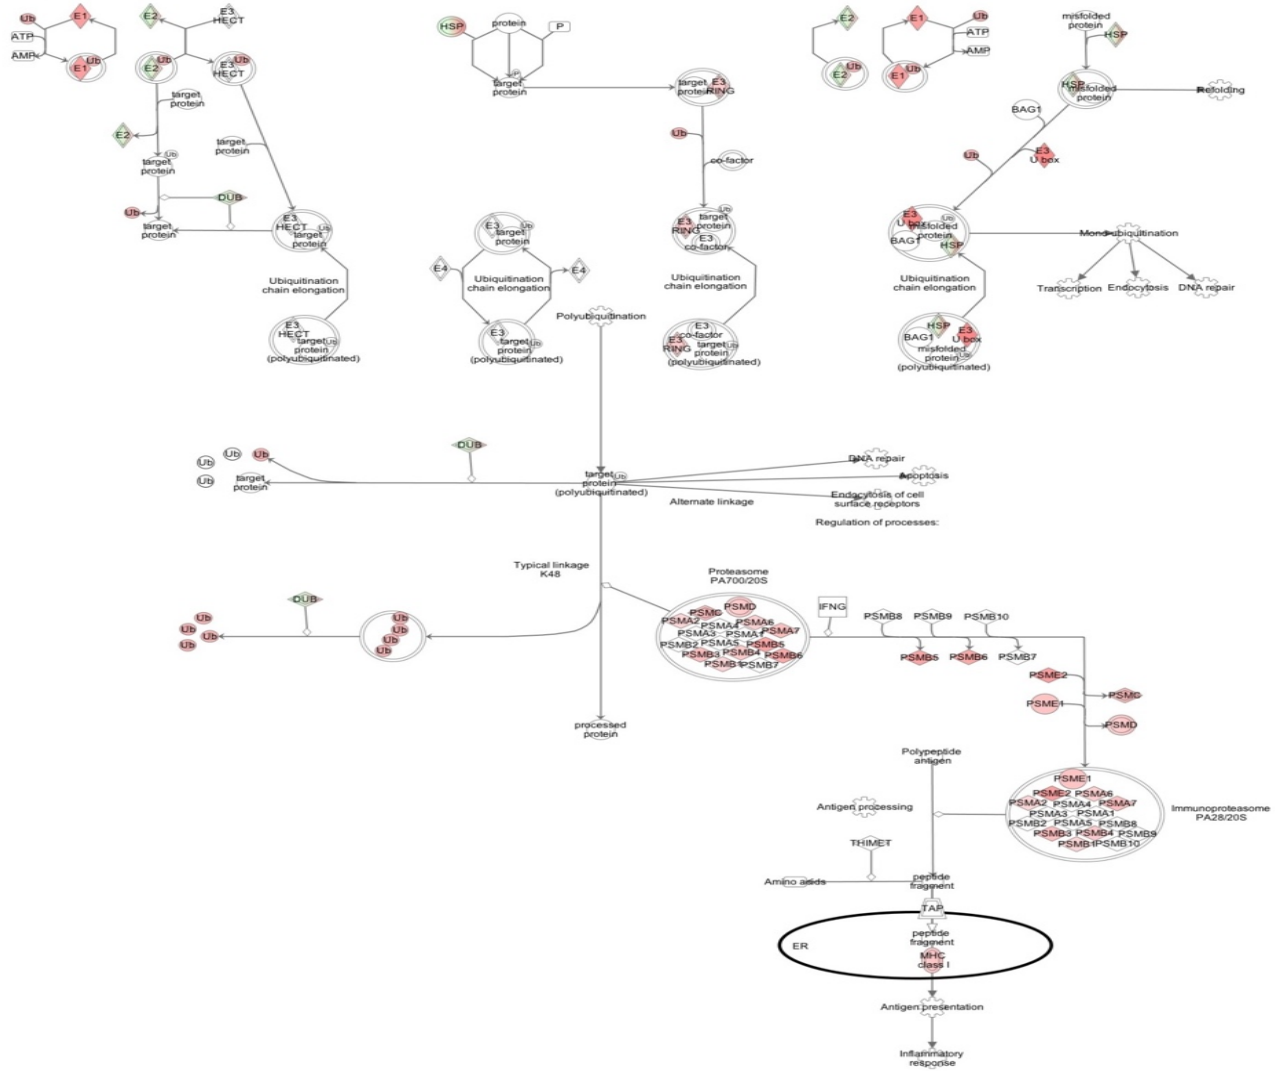



# B

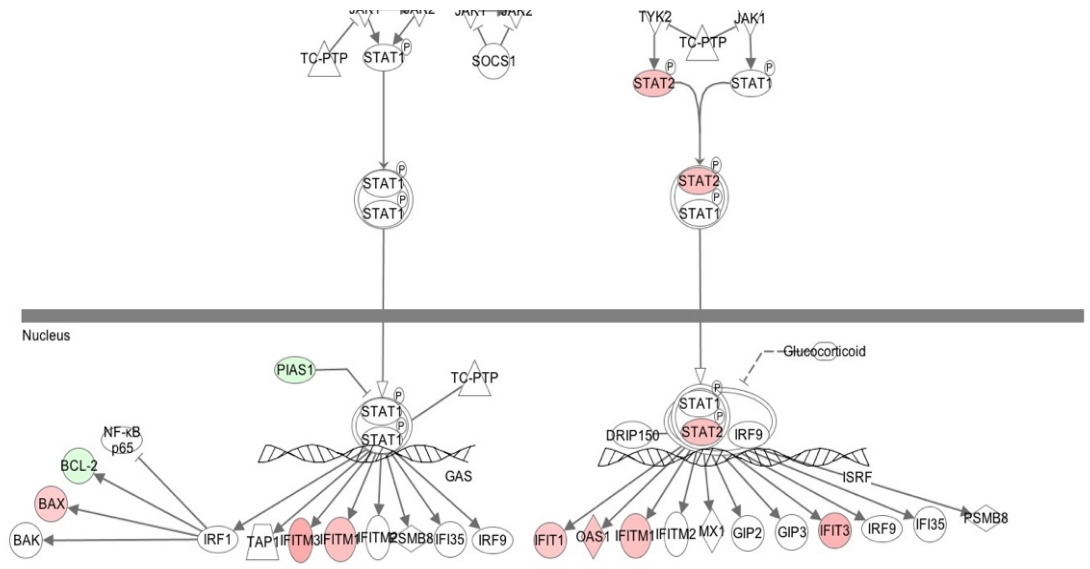

C

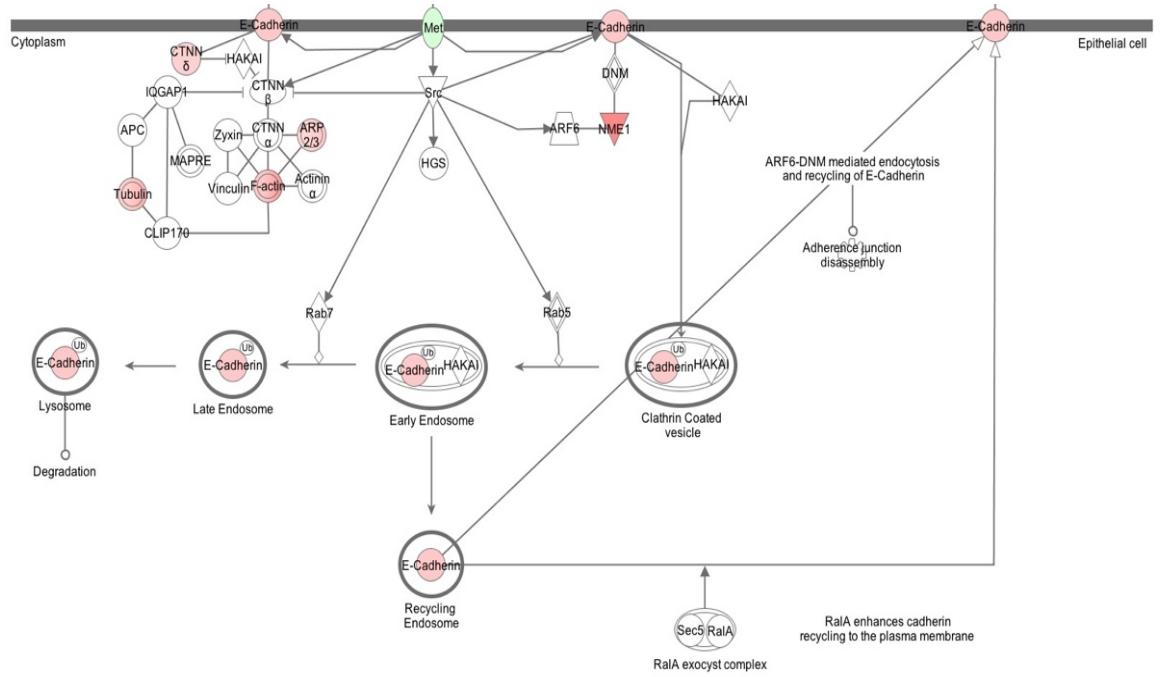

# D

## ILK Signaling

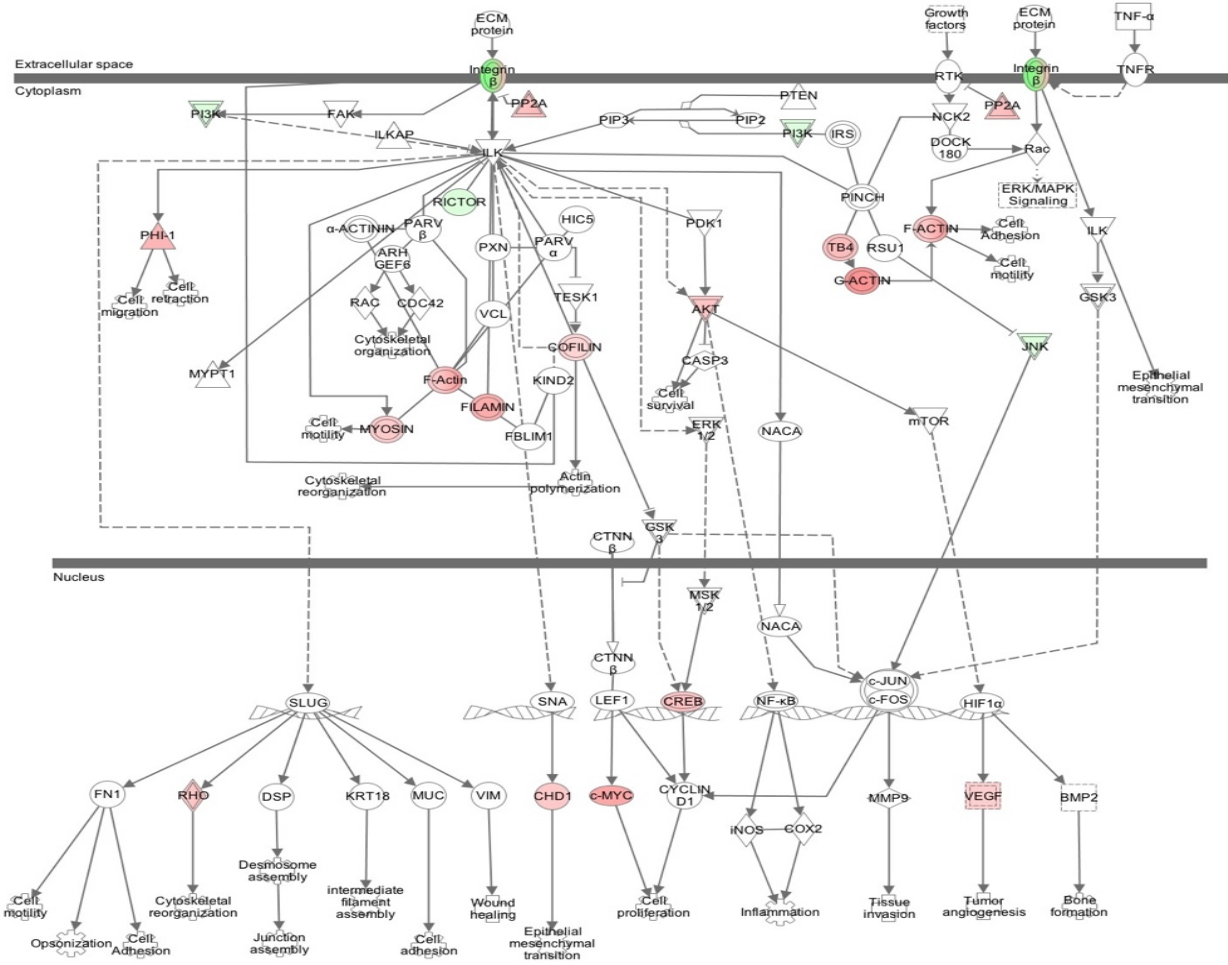

# E

## Regulation of Actin-based Motility by Rho

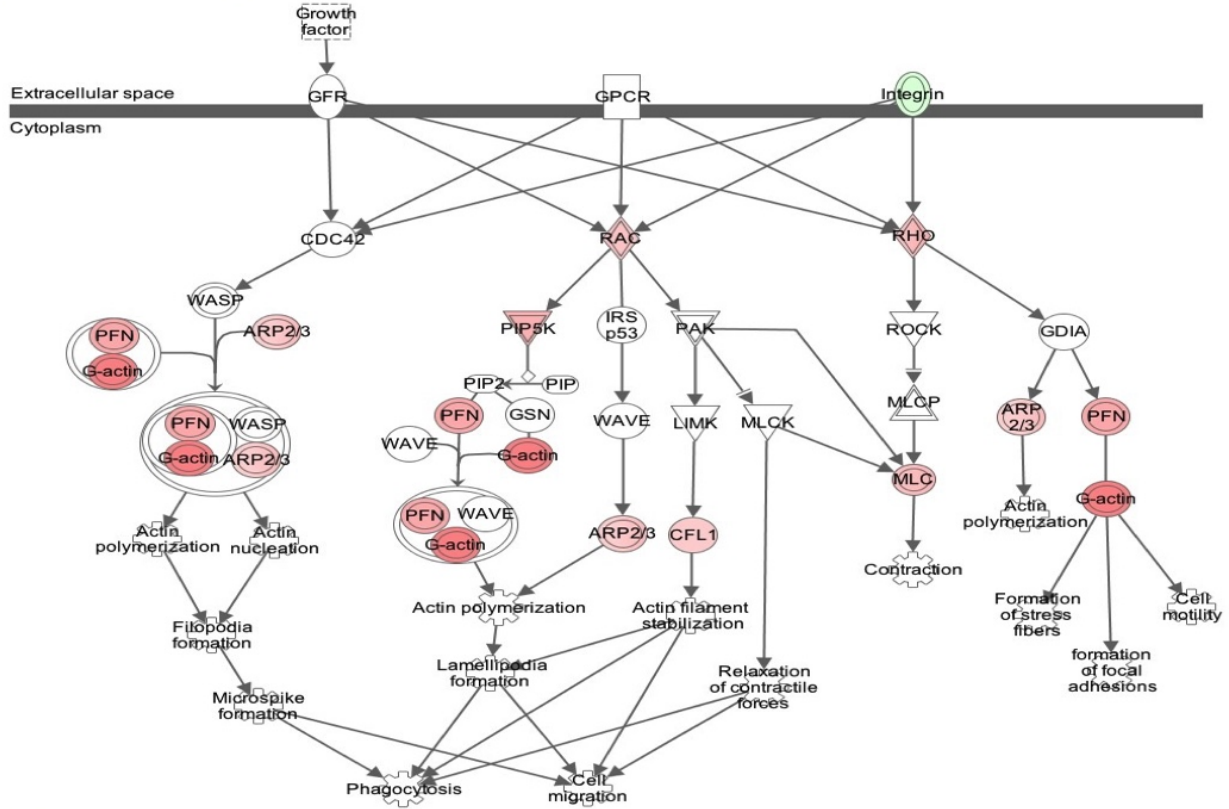

# F

## Estrogen Receptor Signaling

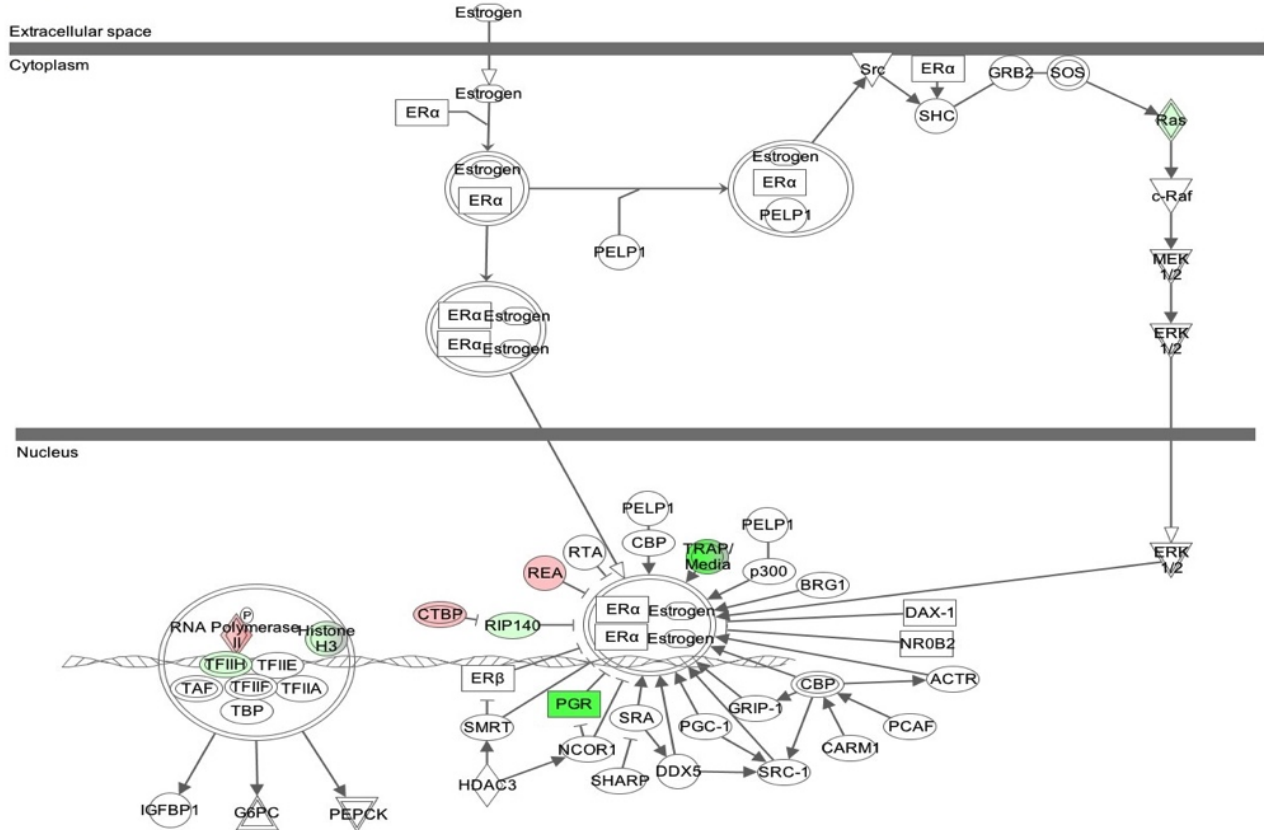

# G

Inhibition of Angiogenesis by TSP1

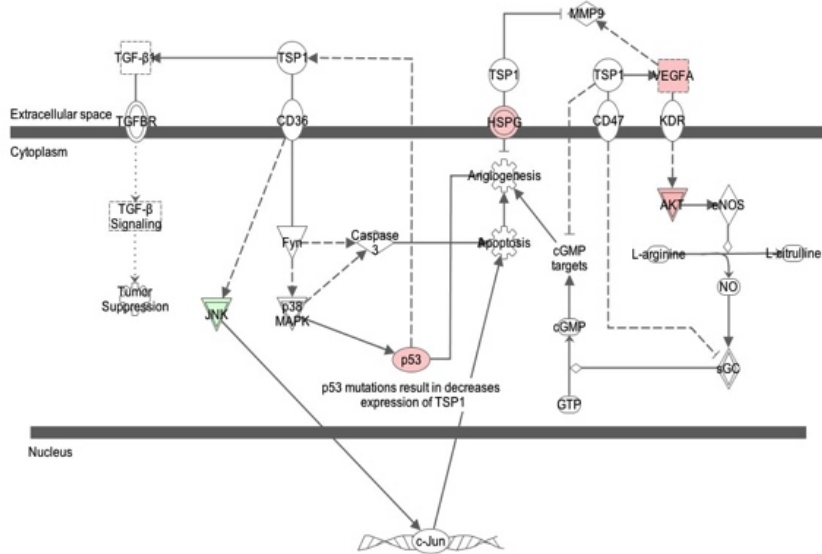

© 2000-2015 QIAGEN. All rights reserved.

# H

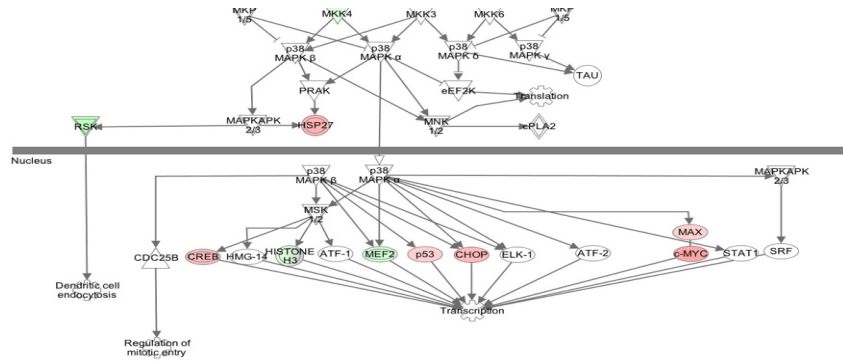

© 2000-2015 QIAGEN. All rights reserved.

**Supplementary Figure S4.** Some canonical pathways associated with other cellular processes are also; (A) protein ubiquitination, (B) Interferon signaling, (C) Remodeling of epithelial adherents junctions, (D) ILK signaling, (E) Integrin signaling, (F) ) Estrogen receptor signaling, (G)Inhibition of angiogenesis by TSP1 and (H) p38 MAPK signaling.

# A

## mTOR Signaling

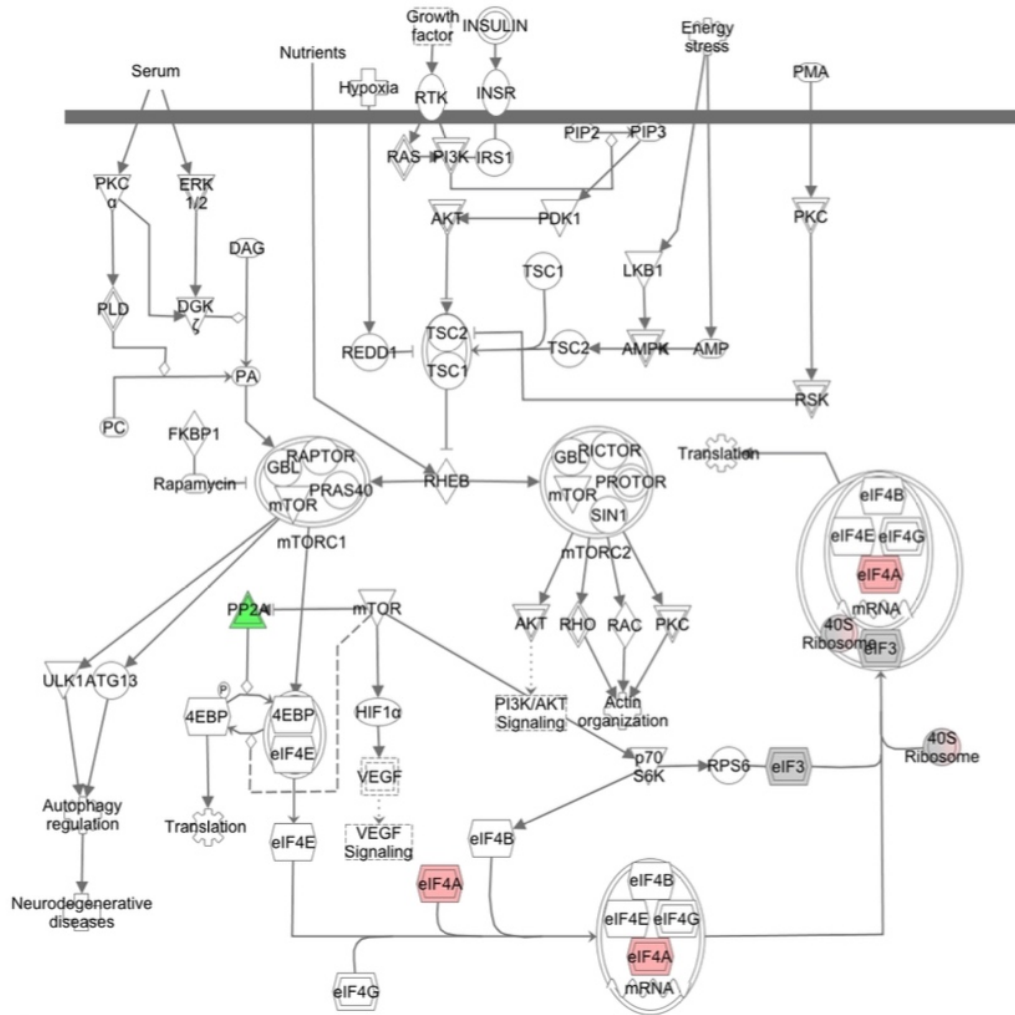



B

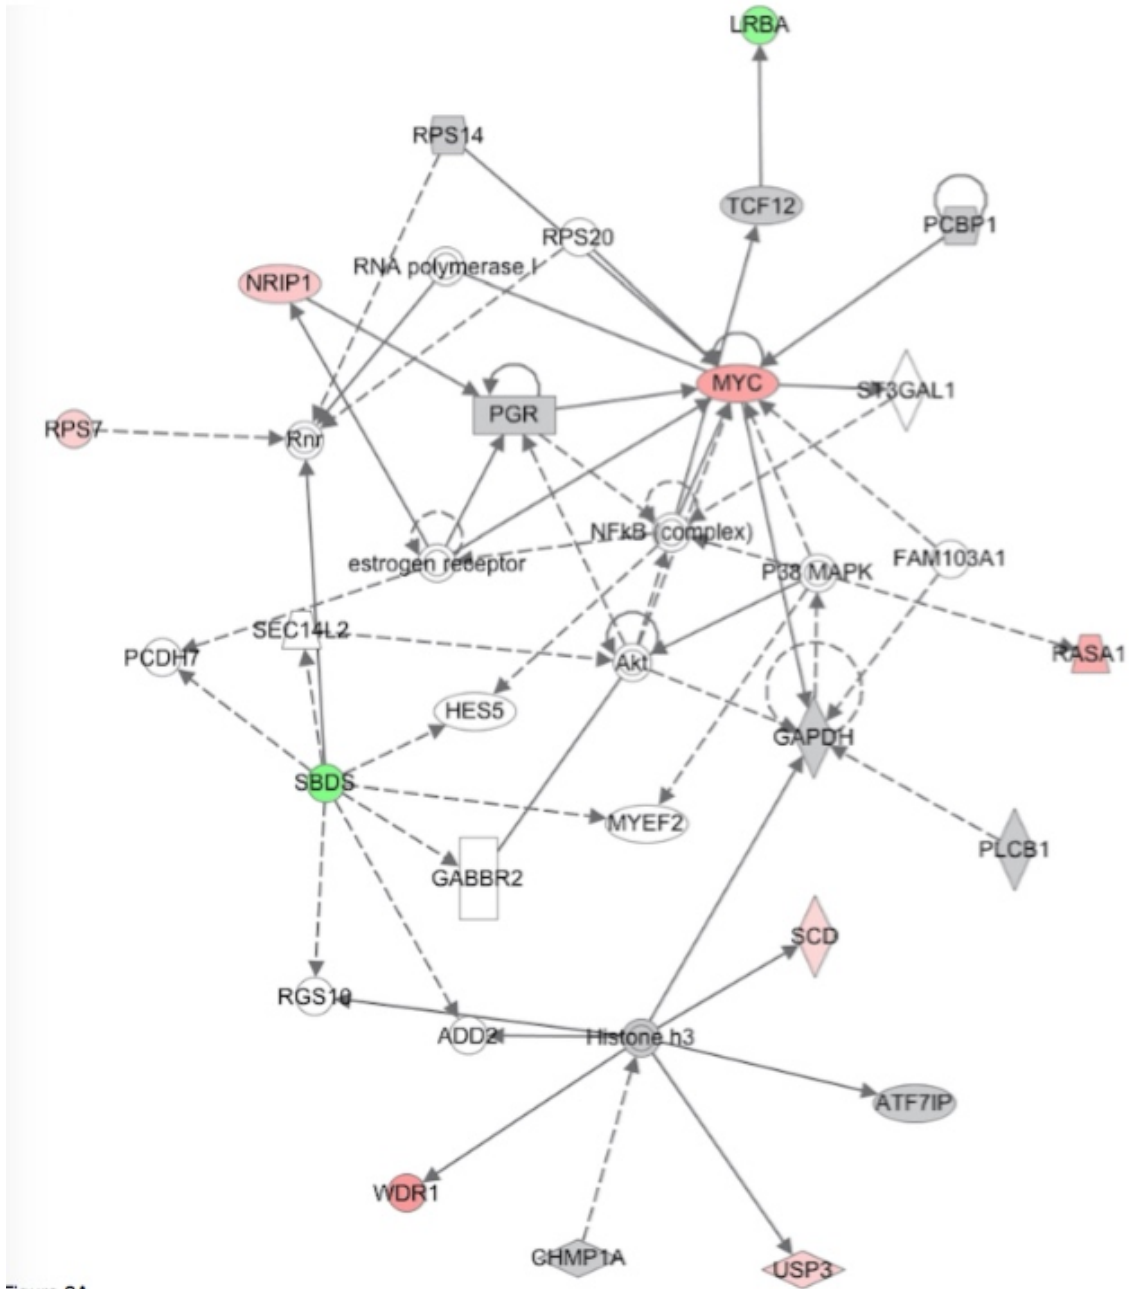

Supplement: srep23373-s1.pdf [file srep23373-s1.pdf]
